# Supplementary material for: Stem–Loop Structures in Iron-Regulated mRNAs of Giardia duodenalis
Source: MDPI journal article supplement (doi:10.3390/ijerph20043556), 2023-02-17
Supplement: s1 [file s1]

Supplementary Material

*Communication*

# **Stem–Loop Structures in Iron-Regulated mRNAs of *Giardia duodenalis***

**Laura Y. Plata-Guzmán <sup>1</sup>, Rossana Arroyo <sup>2</sup>, Nidia León-Sicaïros <sup>3,4</sup>, Adrián Canizález-Román <sup>3</sup>, Héctor S. López-Moreno <sup>1</sup>, Jeanett Chávez-Ontiveros <sup>1</sup>, José A. Garzón-Tiznado <sup>1</sup> and Claudia León-Sicaïros <sup>1,\*</sup>**

<sup>1</sup> Programa Regional del Noroeste para el Posgrado en Biotecnología de la Facultad de Ciencias Químico-Biológicas, Universidad Autónoma de Sinaloa, Av. de las Américas y Josefa Ortiz (Cd. Universitaria), Culiacán 80030, Mexico

<sup>2</sup> Departamento de Infectómica y Patogénesis Molecular, Centro de Investigación y de Estudios Avanzados del IPN (CINVESTAV-IPN), Av. IPN No. 2508, Colonia San Pedro Zacatenco, Mexico City 07360, Mexico

<sup>3</sup> CIASaP Facultad de Medicina, Universidad Autónoma de Sinaloa, Cedros y Sauces Frac. Fresnos, Culiacán 80246, Mexico

<sup>4</sup> Departamento de Investigación, Hospital Pediátrico de Sinaloa, Boulevard Constitución S/N, Col. Jorge Almada, Culiacán 80200, Mexico

\* Correspondence: [claudialeonsicaïros@uas.edu.mx](mailto:claudialeonsicaïros@uas.edu.mx)

**Table S1.** Ends of sequences coding virulence proteins

| Annotation or common name                     | Gene ID        | Region   | Sequence delineated                                                                                                                 |
|-----------------------------------------------|----------------|----------|-------------------------------------------------------------------------------------------------------------------------------------|
| <i>Cathepsin B precursor</i>                  | GL50803_14019  | 5'CR     | cuuuuuccuccaauuu[u]aaaAUGaagcucuucuccucgcccgcugcagcuuucucugc<br>gcccgcugacggucuccgagc                                               |
| <i>Cathepsin B precursor</i>                  | GL50803_14019  | 3'UTR    | ugagUAAgcaaugaaucucu <u>UGUAAAC</u> ggaaga[u]cuca                                                                                   |
| <i>Cathepsin B precursor</i>                  | GL50803_16160  | 5'UTR    | guauucagcagguuuuuau[a]guuucucaccaguuAUGgaugcauugauugagcc<br>aaacaugcuuuuagcuaaagucuuu                                               |
| <i>Cathepsin B precursor</i>                  | GL50803_16160  | 3'UTR    | acuaugcagacguagagUGAauccgcuuuuguccucaacugugucugggugccgg<br>uuaaagcuaaaaaguuacagcgggcauggaccuugaucuccggAUGAACGccgaa[g]<br>agauuaugca |
| <i>Cathepsin B precursor</i>                  | GL50803_16779  | 5'CR     | aagcuuacggaaau[u]uaaAUGaagcucuucuccucgcccgcugcagcuuucucugc<br>gcccgcugacggucuccgagcu                                                |
| <i>Cathepsin B precursor</i>                  | GL50803_16779  | 3'CR/UTR | cauugaagagcaaguaauagguggguucuuugagaacUAAcuggugaauccauuu<br>uauAGUAAAUcaugg[c]caggagggu                                              |
| <i>Cathepsin B precursor</i>                  | GL50803_10217  | 3'UTR    | gacAUGcgccugucuucauacauagcuaccauugcccuaaugggguagaAGUAAAC<br>guuuuu[c]ugguccaugcauuaaaaa                                             |
| <i>Cathepsin B precursor</i>                  | GL50803_15564  | 5'CR     | cuagcauggcuuuuuuuu[a]uugcucaucuuauggucagacggcaccAUGcgcgcg<br>gaauccucugguggcgcugucggu                                               |
| <i>Cathepsin B precursor</i>                  | GL50803_16468  | 3'UTR    | uggcagguagcagugaagUAAacguccaaaggcuuuuugggaaaaAGUCAUGcc<br>cggg[u]guaucuuugcugcacggccgc                                              |
| <i>Cathepsin B precursor</i>                  | GL50803_17516  | 5'CR     | cuuauacaggaauuugcuccuuugaaggaacagagaaauccu[u]uaaaAUGaggcuu<br>cugauccuucugauugcauccua                                               |
| <i>Cathepsin B-like cysteine proteinase 3</i> | GL50803_114165 | 5'CR     | ugcuccgggaacggccacggaa[a]uaaaAUGaugguacuucuaaccauucugcuauug<br>cuauauggcacacuuggcagaga                                              |
| <i>Cathepsin B-like cysteine proteinase 3</i> | GL50803_114165 | 3'UTR    | acuuucacgguaacuagaugacacucauUGAcacacucugaugaacuagauGGUAA<br>AUcuaucc[u]aagcaaagauguugc                                              |
| <i>Cathepsin L precursor</i>                  | GL50803_3169   | 5'CR     | aauaguuaacaacugcaaucuaagac[a]ucucacAUGuuagcgcuauugcucuuaa<br>ugucugcuguguuuccaugaucc                                                |
| <i>Cathepsin L precursor</i>                  | GL50803_3169   | 3'UTR    | ugcugcaggaagUAGgugcggaugacuucuaacuaauagugaauaguagugaauA<br>GUAAUAgacuag[u]ggacaacuuagg                                              |

|                                  |                |           |                                                                                                                          |
|----------------------------------|----------------|-----------|--------------------------------------------------------------------------------------------------------------------------|
| <i>Cathepsin L precursor</i>     | GL50803_16380  | 3' CR/UTR | uacgugauggu <b>gagUA</b> Aauugcccggguuggugaau <b>gugcucuggccuugGUC</b><br><u>AAAA</u> aaug[u]ccuugccaagucauaaa           |
| <i>Cathepsin L precursor</i>     | GL50803_14983  | 3' CR/UTR | agcuacgcgguaguuaa <b>caaaagaaaaagcUA</b> Aaguaaa <b>uucuguggacgcugucua</b><br>auu <b>AGUGCAA</b> ucagg[u]gacuugg         |
| <i>Cathepsin L precursor</i>     | GL50803_17607  | 3' UTR    | uugggUGAcuaaua <b>uagguuacuuaaggagcgcua</b> uagccccu <b>aaacuggccaac</b><br>cuuugc <b>AUGGUAC</b> ucugc[u]gugu           |
| <i>Cathepsin L-like protease</i> | GL50803_3099   | 5' CR     | guaaaaaacgaaaau <b>aaau[u]uaaa</b> agaaccaua <b>AUG</b> uauacu <b>uuguugguguu</b> ca<br><b>uacugucga</b> auccucugcauaucc |
| <i>Cathepsin L-like protease</i> | GL50803_137680 | 5' UTR/CR | guguaaaaccugaagg <b>acuuuu[a]uaaa</b> aguag <b>uagAUG</b> ugguuguccu <b>auuuu</b> cu<br>ggugaucuuuuugcuugaacucuuug       |
| <i>Cysteine protease</i>         | GL50803_112831 | 5' UTR/CR | cggcuaaccuacccgcggcc <b>aa[a]aaaggaccggAUG</b> uugcugcu <b>uacuuugucu</b><br><b>u</b> ccucugcgcggcaucggccgagc            |
| <i>Cysteine protease</i>         | GL50803_112831 | 3' CR/UTR | uacaucuuccacagcccgcuaaccugaaccuuccgcaca <b>agggcgugUAG</b> Gcgccuagc<br><b>gCCCCGAAC</b> uccccg[u]cguaga                 |
| <i>Cysteine protease</i>         | GL50803_113656 | 5' UTR/CR | cggcuaaccuacccgcggcc <b>aa[a]aaaggaccggAUG</b> uugcugcu <b>uaccuugucu</b> uu<br>ccucugcgcggcgucggccgagc                  |
| <i>Cysteine protease</i>         | GL50803_113656 | 3' CR/UTR | uacaucuuccacagccccuacaccugaaccuuccgcaca <b>agggcgugUAG</b> Gcgccuagc<br><b>gCCCCGAAC</b> uccucg[u]cguaga                 |
| <i>Cysteine protease</i>         | GL50803_114773 | 5' UTR/CR | cggcuaaccuacccgcagcc <b>aa[a]aaaggaccggAUG</b> uugcugcu <b>uaccuugucu</b> uu<br>ccucugcgcggcaucggccgagc                  |
| <i>Cysteine protease</i>         | GL50803_114773 | 3' CR/UTR | ccucaaccugaaccuuccgcaca <b>agggcgugUAG</b> Gcgccuagcg <b>CCCCGAAC</b> ucccc[g]<br>ucguagagggugguagguagaug                |
| <i>Cysteine protease</i>         | GL50803_114915 | 5' UTR/CR | cggcuaaccuauccgcggcc <b>aa[a]aaaggau</b> ccgg <b>AUG</b> uugcugcu <b>uacuuugucu</b><br><b>u</b> ccucugcgcggcgucggccgagc  |
| <i>Cysteine protease</i>         | GL50803_114915 | 3' CR/UTR | uacaucuuccacagcccgcuaaccugaaccuuccgcaca <b>agggcgugUAG</b> Gcgccuagc<br><b>gCCCCGAAC</b> uccccg[u]cguaga                 |

|                                                       |                |          |                                                                                                                                    |
|-------------------------------------------------------|----------------|----------|------------------------------------------------------------------------------------------------------------------------------------|
| <i>Dipeptidyl-peptidase III</i>                       | GL50803_3822   | 5'UTR/CR | agggggga <u>aa</u> uaaa[a]uuucc <b>AUG</b> cugccugagaaguauauuugcccgcagagaugga<br>ccgguuucuaacuugaagccaucg                          |
| <i>Dipeptidyl-peptidase III</i>                       | GL50803_3822   | 3'UTR    | ggaaaUAAaug <b>cgacguuguaaguug</b> auuguaauaacugcuuagaucacaucuaau<br>cuagggga <b>GUAAA</b> Gaugg[u]augg                            |
| <i>Dipeptidyl-peptidase I precursor</i>               | GL50803_14566  | 5'CR     | aacaauaagaagccggccaga[a]aaaauc <b>AUG</b> cuuuuca <b>cuuggcgcuuccuggg</b> acu<br>cuuauuauacagauacuccagca                           |
| <i>Dipeptidyl-peptidase I precursor</i>               | GL50803_28651  | 3'UTR    | cugaccaugcauuUA <b>Gaugcacugaguguuu</b> aacugagugcuuau <b>cg</b> <u>CAUAA</u><br><u>AG</u> acucaccuau[u]cucuacaauaaua              |
| <i>Dipeptidyl-peptidase III</i>                       | GL50803_33689  | 5'CR     | gcuagcuuuuacugugaauuuaucauuu[u]ucua <b>AUG</b> ccu <b>aacgaau</b> gcccaucug<br><b>gagcuuuc</b> acggucaaccugaagc                    |
| <i>Dipeptidyl-peptidase III</i>                       | GL50803_33689  | 3'UTR    | guaacaacauccuuguuuuccucugcuaac <b>UGA</b> cuauacagugucuaauuucucga <b>G</b><br><u>CUUAAU</u> cagcaac[u]gcuugugaau                   |
| <i>Encystation-specific protease</i>                  | GL50803_22553  | 3'CR/UTR | caggaggagagugaggagcuaagca <b>ugcuu</b> ucaaa <b>uccaUGAAGUAAA</b> Ugauuc<br>cacaag[u]acaauuacaaaacagccau                           |
| <i>Hypothetical protein</i>                           | GL50803_6369   | 5'UTR/CR | ccucuagaga <u>ga</u> [u]gaa <b>nc</b> agagagagacuc <u>au</u> <b>AUG</b> gacuacuggauugcucgu<br><b>aacucuugggg</b> agaagagugggga     |
| <i>Hypothetical protein</i>                           | GL50803_113303 | 3'UTR    | uucacggauuuggaugacacuc <u>au</u> <b>UGA</b> cacacucuga <b>ga</b> acuagau <b>GUAAAAU</b><br>cuaucc[u]aagcaaagauguugucggu            |
| <i>Sentrin specific protease</i>                      | GL50803_16438  | 3'UTR    | aagaucuggacgagcucug <b>cUAG</b> gccu <b>au</b> gggucuggugucuaaguugugu <b>UUG</b><br><u>AAAA</u> cccuac[u]cugcccguguuaggg           |
| <i>Variant-Specific Surface Protein 150 (VSP-150)</i> | GL50803_135831 | 5'CR     | ugugcucaagggua <u>cu</u> [u]cuuauac <b>AUG</b> aauggcuguuacaaggu <b>u</b> gggu <b>ca</b> agaacc<br><b>aggu</b> agucauauugcaagacagc |
| <i>Variant-Specific Surface Protein 150 (VSP-150)</i> | GL50803_135831 | 3'UTR    | cuggugguucauauaguagagggaagg <b>caUGA</b> cucaggu <b>AGUGAAU</b> gcua[u]ac<br>aaugugugauaauggguauuagagggg                           |
| <i>Variant-Specific Surface Protein 5 (VSP-5)</i>     | GL50803_113797 | 5'UTR    | ccccgggcuuugcguuggaagcgcca[c]ccag <b>caggucggcg</b> gccua <b>AUG</b> uucggcag<br>auuuuugcucgcgaucgucaucc                           |
| <i>Variant-Specific Surface Protein 5 (VSP-5)</i>     | GL50803_113797 | 3'UTR    | ugcuggugguuccucugcagggggaaggcg <b>UAG</b> auguac <b>u</b> agau <b>AGUAAAC</b> c<br>guca[u]cgaugggucugcugcgugucug                   |

|                                                       |               |          |                                                                                                                 |
|-------------------------------------------------------|---------------|----------|-----------------------------------------------------------------------------------------------------------------|
| <i>Variant-Specific Surface Protein 277 (VSP-277)</i> | GL50803_14307 | 5'UTR/CR | caggggccugcgacgccaucgugguc[g]gcaac <b>gacggcagc</b> AUGcucucuuacugu<br>ucaaaguguguuggcgccggcuau                 |
| <i>Variant-Specific Surface Protein 277 (VSP-277)</i> | GL50803_14307 | 3'UTR    | ccucugcuggugguucguguguagaggggaaggcgUG <b>Acuuaggu</b> <u><b>AGUGAAU</b></u> gc<br>ug[u]gcagugugugauagugggugauau |

---

Delineation of the untranslated regions of certain sequences encoding for ribosomal proteins in *G. duodenalis*. At the 5' end: CAATTT element: shading. T/A-rich region: italics. Transcription start site: brackets. Start codon: Uppercase. IRE-like: bold letters. At the 3' end: Stop codon: Uppercase. PolyA signal: Uppercase, italics and underline. Transcription stop site: brackets. IRE-like: bold letters. CR: Coding region.

**Table S2.** Ends of sequences coding ribosomal proteins

| Annotation or common name     | Gene ID       | Region   | Sequence delineated                                                                                                                             |
|-------------------------------|---------------|----------|-------------------------------------------------------------------------------------------------------------------------------------------------|
| <i>Ribosomal protein L3</i>   | GL50803_16525 | 5'UTR/CR | uuccgggucug <del>aaaag[a]caaggcccg</del> <b>AUGuccaccgcgaaguucucgugcugcc</b><br><b>gcaagggca</b> accucggcuaccu                                  |
| <i>Ribosomal protein L4</i>   | GL50803_17547 | 3'CR/UTR | cgcucgaucccagcggaacgguca <b>ugcccaagUAAaucgcuggCGCAAAA</b> cgu<br>u[u]gcacaaugaggagccucgagga                                                    |
| <i>Ribosomal protein L7a</i>  | GL50803_17244 | 5'UTR/CR | uggguuca[a]uaaaac <b>aggccucgacAUGuccaagguuucuggcagcgacauuaag</b><br><b>agggccucg</b> ccguacccgagaa                                             |
| <i>Ribosomal protein L7a</i>  | GL50803_17244 | 3'CR/UTR | ggcguucgcccgaggau <b>gaggccagcagaugUAAaugccu</b> acauuuuuu <u>A</u><br><u>GUGCAU</u> guccuu[u]gcugcuugguc                                       |
| <i>Ribosomal protein L7Ae</i> | GL50803_2825  | 5'UTR/CR | uggaaaauguaauaaauu[a]aaacucaauugaa <b>caaggAUGccagaugcacgcgc</b><br><b>uguuucccuugg</b> ccucagaggccc                                            |
| <i>Ribosomal protein L7Ae</i> | GL50803_2825  | 3'CR/UTR | acaagcuaaacauauuccuu <b>acggagcuaggacacUGAuccggAGUAAA</b> Uggu<br>gg[u]gaagcaguguggccugcccauc                                                   |
| <i>Ribosomal protein L7Ae</i> | GL50803_11287 | 3'UTR    | gcacugguaugac <b>gggagugcguu</b> acagugcaagcaucacuaguaa <b>augcucacc</b><br><b>ggua</b> c augcuacacacuacuaguauuug <b>AGUGCA</b> cuaua[u]acgaagg |
| <i>Ribosomal protein L9</i>   | GL50803_17056 | 5'CR     | aaucgcuuucgaugcucuuuu[u]uuagaggucgcgaagca <b>AUGccccucuguuc</b><br><b>cuccaugacgau</b> caaggucgccgac                                            |
| <i>Ribosomal protein L10</i>  | GL50803_10428 | 3'CR/UTR | ggaagggggcccucaacu <b>ugaagcucUGAuccggguccca</b> gcaca <u>AGUAAA</u> Ua<br>auugccaggcauu[u]acuccucugcc                                          |
| <i>Ribosomal protein L10a</i> | GL50803_1345  | 3'UTR    | uucUAA <b>gaucuuUGAGAA</b> Gguucccgggguuu[u]gcau                                                                                                |
| <i>Ribosomal protein L12</i>  | GL50803_14938 | 5'CR     | uuauaguuaaagcauuuuuuuugau[a]uuuugucagagugguaguuuuccaggc<br>gaca <b>AUGccccagagcugauccuaacgcagagauaguucugu</b> auuuugcgcuca<br>agggcggg          |
| <i>Ribosomal protein L12</i>  | GL50803_14938 | 3'CR/UTR | uugcugaggagcaagagacagag <b>UAAacaaggugccc</b> ugcgugucacggaucggu<br>cccuauugcuugggacuguuuucgcuacggggg <u>CUUAAA</u> Auuu[u]cgau<br>ggccgaggcggc |
| <i>Ribosomal protein L13</i>  | GL50803_14622 | 5'UTR/CR | uggaagcucgugcaauugc[a]cuuaua <b>AUGgcaaguuaugcuucuuuuu</b> auuu<br>gagauuaauucauuuuuuuugaauu                                                    |
| <i>Ribosomal protein L13a</i> | GL50803_11247 | 5'UTR/CR | uuuuuuuggauuuagcgcaaauc[u]guuuugcucacggcgagcc <b>AUGucgcgauc</b><br><b>guuaucgacugcaaggggc</b> acauac                                           |

|                               |               |          |                                                                                                                                                                                                               |
|-------------------------------|---------------|----------|---------------------------------------------------------------------------------------------------------------------------------------------------------------------------------------------------------------|
| <i>Ribosomal protein L15</i>  | GL50803_8001  | 5'CR     | uc <u>auagga</u> ucauu[u]uuuacccggccugaauucgAUGggugccuacaaguacguu<br><b>caggagcucugggcg</b> caagaagcaa                                                                                                        |
| <i>Ribosomal protein L15</i>  | GL50803_8001  | 3'CR/UTR | aaccacaccgcucccucc <b>cgccgc</b> uacagaUAGccuugcugcugcgAGUAAACa<br>ucccgucauu[u]acacuagaggaag                                                                                                                 |
| <i>Ribosomal protein L17</i>  | GL50803_98056 | 3'UTR    | gaaggcgcuccagUGAgucugucgggaguaa <b>augcgcugcu</b> cuuuccaacuucu<br><u>AAUAAU</u> ugaaaugucuaa <b>uguggggu</b> acauuccgauu[u]cggcccuucccg<br>uuuuuucucggaacu[u]uuucgaccucccgacAUGgcuaa <b>ucugaggcug</b> cagaa |
| <i>Ribosomal protein L19</i>  | GL50803_16431 | 5'UTR/CR | <b>gcgccugggcggcag</b> acguccucaa                                                                                                                                                                             |
| <i>Ribosomal protein L21</i>  | GL50803_15520 | 5'CR     | uuuuuuuuu <u>ucauuu</u> [u]caaugcugcccga <b>aaagcg</b> aggacgacucgAUGacgcac<br><b>agccagggguacaggugu</b> aagac                                                                                                |
| <i>Ribosomal protein L21</i>  | GL50803_15520 | 3'UTR    | cgacaucaccccacucaag <b>uaugacgg</b> aguuuucUAG <b>gcuccgcag</b> aag <b>uaaaug</b><br><b>gccug</b> cgggcgggcuAGUGGAggcugggcu[u]ccaccgg <u>uuccucg</u> acgcgcu                                                  |
| <i>Ribosomal protein L23</i>  | GL50803_10091 | 5'UTR/CR | acaacuuuaauuucgcuuuu[u]acucguuuccuaa <b>ugacgg</b> aucgaggagAUGgc<br><b>gucgaagcguggcagguc</b> ggagg                                                                                                          |
| <i>Ribosomal protein L23</i>  | GL50803_10091 | 3'CR/UTR | cgacggcugagug <b>cguccac</b> UAGgcAGUAAACgaa[u]uc                                                                                                                                                             |
| <i>Ribosomal protein L23A</i> | GL50803_7870  | 5'CR     | aauuucgccgucua[a]uaucucgugccggcgagacAUGuccgaga <b>aggcg</b> caggca<br>cugaaggcccaaaaggcgauuu                                                                                                                  |
| <i>Ribosomal protein L24</i>  | GL50803_14869 | 5'UTR/CR | aguguuucucuaccauuuaa <u>uacuuuaa</u> [a]uaauucaggaacaAUGccucgc <u>au</u><br><b>agagcauugcu</b> cauucuguccaa                                                                                                   |
| <i>Ribosomal protein L26</i>  | GL50803_15046 | 5'UTR/CR | aaauaa <u>uucg</u> auuugaaauggaaauggcccauuuuuuu <b>gaau</b> caccggcggaagccu<br><b>gga</b> AUGaagcucaacuccgcccgu <b>caccgcg</b> ucccgucgaagugccgcaaggcuac<br>uucaca                                            |
| <i>Ribosomal protein L27a</i> | GL50803_16310 | 5'UTR/CR | acaaaaaag <u>ua</u> auuuuuuuuuuacauuuuccccacgg <u>ucu</u> [a]aaaagggg <u>ccu</u><br><b>cgag</b> AUGccgaccagaau <b>cagg</b>                                                                                    |
| <i>Ribosomal protein L31B</i> | GL50803_16368 | 5'UTR/CR | ucugaauugucccu <b>gcaa</b> [a]aaacggguccuccga <b>agcgug</b> AUGgguauugua <b>ua</b><br><b>ugagcauacga</b> uccgcuca <b>acaa</b>                                                                                 |
| <i>Ribosomal protein L31B</i> | GL50803_16368 | 3'CR/UTR | gcagcgaagacggcagcgagUAAacuugugcagcucgcauuuacauaugcuuuu<br>uugcCGUAAGUggg[u]cguccug                                                                                                                            |
| <i>Ribosomal protein L34</i>  | GL50803_36069 | 5'UTR/CR | uuuuuuuuuac[u]aaagagcugcccgc <b>ccgag</b> AUGgccgacugcgcgucacuugcc<br>gcuuccacuccacauacaggacu                                                                                                                 |

|                              |               |          |                                                                                                                                                                                                                                       |
|------------------------------|---------------|----------|---------------------------------------------------------------------------------------------------------------------------------------------------------------------------------------------------------------------------------------|
| <i>Ribosomal protein L34</i> | GL50803_36069 | 3'CR/UTR | agcuaagacggccaagcagaccgccggcaagggg <b>gaugcgaagUAAaucgaucagca</b><br>uuuacgucucacuuucgggccuuccgaaccccgccugggacucauggggaaucuc<br>ggcuucuggggcu <b>UUGAAG</b> cugcuu[u]ccccggggcgccugccuugau<br><i>Ribosomal protein L35</i>            |
|                              | GL50803_6133  | 5'CR     | ucucgcacaccg <b>gaagag[u]caacuugccAUGgcauccuguuugcccuaccagauag</b><br><b>auguuau</b> caauguauuuuaaa                                                                                                                                   |
| <i>Ribosomal protein L35</i> | GL50803_6133  | 3'CR/UTR | cuccaguucccgaaagcugaaguaugcu <b>guaaaggucUGAgcaccucgguguuagu</b><br><b>aaauac</b> ucucuugcuuccuuucaccgcguagaacauagcagaugcggagugcgua<br>uggcgcacgu <b>GUGAAA</b> cucgccagguuu[u]gcaaggguagcaggugggagc<br><i>Ribosomal protein L35a</i> |
|                              | GL50803_5947  | 3'CR/UTR | gagcgcuugacgggaaccccaa <b>cgcgacgguaaccuacgaguaaaauagucaggcg</b><br>gcuuguggc <b>GUGAUG</b> cugggggucucgccugugguu[u]acugcuuugc<br><i>Ribosomal protein L36-1</i>                                                                      |
|                              | GL50803_16114 | 5'CR     | uuuauuuuccaauccauuuuaauucauuucaaauuccg <b>auuu[a]gaaggagcgg</b><br>uguggu <b>AUGccaggcaaaguauucaaccugaagaaggcgggcg</b> caguaguucgca<br>uuugccgca<br><i>Ribosomal protein L37</i>                                                      |
|                              | GL50803_14171 | 5'CR     | ccuccaugccggacauagcauuuuuuuuggaauuagucgc <b>uguu[a]aaaacgggaa</b><br>cucg <b>AUGuccaagggcacagcgucguucgguaagcgccacacgcgc</b> cauucacggca<br>gcugcc<br><i>Ribosomal protein L37</i>                                                     |
|                              | GL50803_14171 | 3'CR/UTR | gcaaacgccaggaagu <b>accuugccaagUAAauuugcacgaggucgguccgAUGG</b><br><b>AUG</b> ccuacacgc[c]ggugcgucgcg<br><i>Ribosomal protein L37a</i>                                                                                                 |
|                              | GL50803_5517  | 5'CR     | ucuggaaauuuauaaaaa <u>u[u]aaaau</u> gaaucucugcaagcgaagcggcucaggcg<br>agcu <b>AUGccaagaggacuaaaaagguuggucacccggga</b> aguacggcacucgcu<br>auggga<br><i>Ribosomal protein L37a</i>                                                       |
|                              | GL50803_5517  | 3'CR/UTR | cacgauccgccgcc <b>uccgucuggcccgugaagacgcacagUAAaguaaacagagug</b><br><b>ga</b> ccuggcacugcggu <b>UUGCAA</b> cugucugcauagcuguu[u]acucgucc<br><i>Ribosomal protein L44</i>                                                               |
|                              | GL50803_9810  | 5'UTR/CR | aaaugcaauugaauuagcuuug <b>caugcuacu[u]aacagcagcgccgaaggacAU</b><br><b>Ggugacauauccggcagagcgca</b><br><i>Ribosomal protein SA</i>                                                                                                      |
|                              | GL50803_7766  | 3'UTR    | cucuucgacgaguacUAAggcggcucucuuaa <b>agcugaaaguguaaacgcuuug</b><br><b>cug</b> gguaugcaucccuguuucaccagagagguuucacaacuccaggacgguuccuu<br>cugcgauuccgaggauuu <b>CGUAAA</b> gucuggcuauc[u]ggcacuacaagugu<br><i>Ribosomal protein S2</i>    |
|                              | GL50803_8118  | 5'CR     | uaauuuugauuuagacuuguagcc <b>aaaac[u]aacgu</b> ccauggcgua <b>gcAUGcag</b><br><b>gcugaaagugcucccaggccagaa</b><br><i>Ribosomal protein S4</i>                                                                                            |
|                              | GL50803_11359 | 5'CR     | ggauggu <b>auuc[u]gguuu</b> agcagcga <b>AUGgcccugggaguccgcaagc</b> accuuuag<br>cgccuacgcaccgaagcacug                                                                                                                                  |



|                               |               |          |                                                                                                                                              |
|-------------------------------|---------------|----------|----------------------------------------------------------------------------------------------------------------------------------------------|
| <i>Ribosomal protein S5</i>   | GL50803_12981 | 3'UTR    | uauagccguuuccaaccgcUA Aacgccc <b>aggaguaaaccgccccu</b> cugagagaucgg<br>ugucaguccucaaaa <b>AAUCAU</b> auuuuggaugaguugcgguu[u]cuccuugcug       |
| <i>Ribosomal protein S6</i>   | GL50803_14620 | 5'UTR/CR | uggugagaaagcauuuuuuuucauuuucuagu <b>uuc[a]uaaaaauggccccgggguga</b><br><b>AUGccaaagggcucauu</b> cugcaag                                       |
| <i>Ribosomal protein S6</i>   | GL50803_14620 | 3'CR/UTR | aagccugcuaa <b>aggacggguagUA</b> Aacagacgucuuuacuacgggc <b>CUGA</b><br><b>AUC</b> uguucgu[u]gcagcguugccuua                                   |
| <i>Ribosomal protein S8</i>   | GL50803_5845  | 3'CR/UTR | ggaccugagcuucucuuccaaga <b>agaagu</b> ggcaccuaag <b>UA</b> Acaucc <b>AGU</b><br><b>GCUU</b> cgugguc[u]ccccacucucg                            |
| <i>Ribosomal protein S9</i>   | GL50803_4547  | 5'UTR/CR | uauuuuuuuuucauuu <b>uggcuu</b> ucgccaau[u]cuccccugacgauucc <b>AUGccccg</b><br><b>cauuagccgccauagga</b> acucgu                                |
| <i>Ribosomal protein S10B</i> | GL50803_10919 | 3'CR/UTR | aagcaag <b>UA</b> Aa <b>aucugag</b> cccauagcuuccacgcacagaugauccccagcggaug<br>uugg <b>AGUAAAU</b> caagucc[u]gg                                |
| <i>Ribosomal protein S11</i>  | GL50803_14827 | 5'UTR/CR | cuugagagagccgagacucugcgcaaggcugc[u]uac <b>gagAUG</b> gcugagaaccag<br><b>cacgagc</b> gagcguaucacaagcaa                                        |
| <i>Ribosomal protein S11</i>  | GL50803_14827 | 3'CR/UTR | gagccugucag <b>cgaggcccca</b> agaagcgcucucgcccuc <b>UAG</b> gcagcacu <b>AG</b><br><b>UAAAU</b> aaggg[u]cauucacaaggc                          |
| <i>Ribosomal protein S12</i>  | GL50803_33862 | 3'CR     | gggacgucgacagcuucc <b>uuacua</b> agcuggacgagcag <b>UA</b> Aacgacauacu <b>AG</b><br><b>UCGUG</b> cgga[u]cgguagugggauu                         |
| <i>Ribosomal protein S13</i>  | GL50803_16652 | 5'UTR/CR | auagcauuu[u]agcgggcacgugacaaagcc <b>AUG</b> ggccgcaugcacucgaagggg<br><b>aagggua</b> uauc <b>ccgcucug</b> ccau                                |
| <i>Ribosomal protein S13</i>  | GL50803_16652 | 3'CR/UTR | guccgaccaggccgcccgcucuccu <b>g</b> cgacguac <b>gcgUG</b> Aguaaacaccgcuacgg<br>ggcucgaacccgcgaccguugg <b>AUUAAA</b> aguccaacgcuc[u]accaacugag |
| <i>Ribosomal protein S14</i>  | GL50803_7878  | 5'CR     | uuuugaauugacuuuagaagg <b>acaaa[u]u</b> ugaggugggcuga <b>AUGucucgcaaa</b><br><b>guaaccuacgcgcgggaga</b> aucuuc                                |
| <i>Ribosomal protein S15</i>  | GL50803_15260 | 3'CR/UTR | ccgcugcgu <b>UAG</b> ucccccccacc <b>AGUAAA</b> Cauucc[u]cg                                                                                   |
| <i>Ribosomal protein S15A</i> | GL50803_15228 | 5'UTR/CR | cgcacaucgcgugccgugcugcugggaagcaga[u]ccaguaggc <b>AUG</b> guucgcau<br><b>caacguucuccgugacg</b> cacuca                                         |
| <i>Ribosomal protein S16</i>  | GL50803_4652  | 5'CR     | uuuauuuccacuuccgguccca[u]aaaaagcggcuccccg <b>AUG</b> gcgaagggaacag<br><b>aagagacu</b> uacuggaaaggaac                                         |
| <i>Ribosomal protein S16</i>  | GL50803_4652  | 3'CR/UTR | uuugguggccguggucgucgucccgucgccagaaguc <b>guaccguUA</b> Agcgggcu<br><b>ucguccua</b> aguaaacauacugcauccaaauacacgcugucaucucaccacugaccu          |

|                               |               |           |                                                                                                                                                                                                                                                                                                                                                                                                                                                                        |
|-------------------------------|---------------|-----------|------------------------------------------------------------------------------------------------------------------------------------------------------------------------------------------------------------------------------------------------------------------------------------------------------------------------------------------------------------------------------------------------------------------------------------------------------------------------|
| <i>Ribosomal protein S20</i>  | GL50803_6022  | 5' CR     | ggccuccugggccguuguuguaguaggaggcuugggugucguagccauaugacug<br>gccguaccgauuuuu <u>GUGAU</u> Caccauaagcgugcu[u]ccauguccugcc<br>uaaaauga <u>uuucu</u> [u]uaaguacgaaaacgcggccaccgagggcuAUGgcagagagc <b>g</b><br><b>ugucgacugggaggcg</b> ugaauuu                                                                                                                                                                                                                               |
| <i>Ribosomal protein S21</i>  | GL50803_7082  | 5' CR     | uaaaugauuuuuuguccuaca <u>a</u> ]uuggaccgaaacgacugagccAUGcaau <b>cg</b><br><b>augacaucggg</b> augaagaacagc                                                                                                                                                                                                                                                                                                                                                              |
| <i>Ribosomal protein S21</i>  | GL50803_7082  | 3' CR/UTR | cggucucauggaac <b>gccuuUA</b> <u>Gguugccgcauacacccggccaaguaaacgc</u> cucuga<br>uacuugcuguauuccugcgugauuuacacagccuucggguucagagcgagcaccu<br>ggcugcuagguc <u>GUAAC</u> Cggccucaugacagcaucguuu[u]ggggaacc<br>cgugcgcuUA <b>Agcacggcgugu</b> aa <b>acugccacuggcug</b> ugcauuuu <u>AGUU</u><br><u>UA</u> cucuucuaagcgcu[u]gagccacacuccauacagaauuucgugugucugaa<br>uuuuuuuucugaauuucguuguc <u>a</u> ]uuuagcggggcuagcgAUGccc <b>gagauca</b><br><b>caguuaaggugaggaagg</b> uccuca |
| <i>Ribosomal protein S23</i>  | GL50803_14699 | 3' UTR    | gcgaggaaggcgccacggcacgccccg[g]gccc <b>cagga</b> AUG <b>cg</b> cagug <b>cacugga</b><br><b>caccggcg</b> uag <b>cggcug</b> accgc                                                                                                                                                                                                                                                                                                                                          |
| <i>Ribosomal protein S24</i>  | GL50803_10367 | 5' CR     | auauccaagacaaa[u]aaggagcgucacccgagcucguucguAUGcagag <b>ucaagaa</b><br><b>accgcguguguuu</b> uggccgcu                                                                                                                                                                                                                                                                                                                                                                    |
| <i>Ribosomal protein S29a</i> | GL50803_39483 | 5' UTR/CR | agucuucgacUGAgucugcaugcacaaggacgagggcuuu <b>acuguaaaggAGU</b><br><u>GAA</u> caccgauuu[u]auuguuacgcu                                                                                                                                                                                                                                                                                                                                                                    |
| <i>Ribosomal protein P1B</i>  | GL50803_17337 | 5' CR     |                                                                                                                                                                                                                                                                                                                                                                                                                                                                        |
| <i>Ribosomal protein P1B</i>  | GL50803_17337 | 3' UTR    |                                                                                                                                                                                                                                                                                                                                                                                                                                                                        |

---

Delineation of the untranslated regions of certain sequences encoding for ribosomal proteins in *G. duodenalis*. At the 5' end: CAATTT element: shading. T/A-rich region: italics. Transcription start site: brackets. Start codon: Uppercase. IRE-like: bold letters. At the 3' end: Stop codon: Uppercase. PolyA signal: Uppercase, italics and underline. Transcription stop site: brackets. IRE-like: bold letters. CR: Coding region.

**Table S3.** Ends of sequences coding cytoskeleton proteins

| Annotation or common name    | Gene ID       | Region    | Sequence delineated                                                                                                                                                                                 |
|------------------------------|---------------|-----------|-----------------------------------------------------------------------------------------------------------------------------------------------------------------------------------------------------|
| <i>Actin-related protein</i> | GL50803_8726  | 3' CR/UTR | ccgaaaccaguugccuu <b>ugagguuUGAaaggccucgugucu</b> <u>AUGGUAU</u> au<br>acuauu[u]ccgaugaauaaucgcu                                                                                                    |
| <i>Actin-related protein</i> | GL50803_16172 | 3' CR/UTR | ugaaaucuu <b>aaugaaagugauaaugUGAcacucuuacaaaagacucuu</b> agagc<br>ggaucaucguugcccucauacuugucuc <u>UGUAAGC</u> gauccugccuuu[u]<br>acagcacuu                                                          |
| <i>Actin-related protein</i> | GL50803_11039 | 3' CR/UTR | gaaaaggcaacaa <b>agUA</b> <u>Aguacauaagagu</u> aa <u>uaacu</u> aucuaucuaagaua<br>uauaguguggggugcauguuuuuu <u>AGUGAA</u> uccaacagaacaaaugcggg<br>accuuguauacauuaagccuauaaaauauggaaucauuu[u]aguuuuaua |
| <i>Hypothetical protein</i>  | GL50803_17591 | 3' UTR    | cuggacuggaacacaac <b>UGAuuuuuaggauu</b> <u>AGAAUA</u> Aaccguggaagau[<br>u]cugcuugcuauuuuuuggcuuugcu                                                                                                 |

Delineation of the untranslated regions of certain sequences encoding for ribosomal proteins in *G. duodenalis*. At the 5' end: CAATTT element: shading. T/A-rich region: italics. Transcription start site: brackets. Start codon: Uppercase. IRE-like: bold letters. At the 3' end: Stop codon: Uppercase. PolyA signal: Uppercase, italics and underline. Transcription stop site: brackets. IRE-like: bold letters. CR: Coding region.

**Table S4.** Ends of sequences coding metabolic proteins

| Annotation or common name                 | Gene ID       | Region   | Sequence delineated                                                                                                         |
|-------------------------------------------|---------------|----------|-----------------------------------------------------------------------------------------------------------------------------|
| <i>Glucosamine-6-phosphate deaminase</i>  | GL50803_8245  | 5'CR     | ccucgcaaaa[u]aaaaAUGccguccauccacgucuccaaa <b>ugcgcu</b> gauccagcca<br><b>uaaagcuugcccaccguauc</b>                           |
| <i>Pyruvate-flavodoxin oxidoreductase</i> | GL50803_17063 | 5'CR     | cgaagugaaauacaacauuuugccccaauaa[a]uuuaaAUG <b>ucugugguccacgc</b><br><b>gccuauagacggc</b> ugucacgcg                          |
| <i>Pyruvate-flavodoxin oxidoreductase</i> | GL50803_17063 | 3'CR     | cuacaagaaguacagcgaaugcaggcgac <b>ccgccaaggcggag</b> UAAgc <u>AGUGA</u><br><u>A</u> cuuuc[u]uucaugucugggcgg                  |
| <i>Thioredoxin reductase</i>              | GL50803_9827  | 5'CR     | acgagcauu[u]uuuaAUGuccacucagcgccacgucaggauccggaaucaucggcgg<br><b>aggcccugcaggccu</b> cacugc                                 |
| <i>Thioredoxin reductase</i>              | GL50803_9827  | 3'CR/UTR | aaggcggcacucgacgccgagcgcug <b>gcuugccaugcaggagUAAGUAA</b> Augg<br>cagcgggcccug[u]ggcuccaguucagccgaaaggauagcuggggggaggggaugu |

Delineation of the untranslated regions of certain sequences encoding for ribosomal proteins in *G. duodenalis*. At the 5' end: CAATTT element: shading. T/A-rich region: italics. Transcription start site: brackets. Start codon: Uppercase. IRE-like: bold letters. At the 3' end: Stop codon: Uppercase. PolyA signal: Uppercase, italics and underline. Transcription stop site: brackets. IRE-like: bold letters. CR: Coding region.

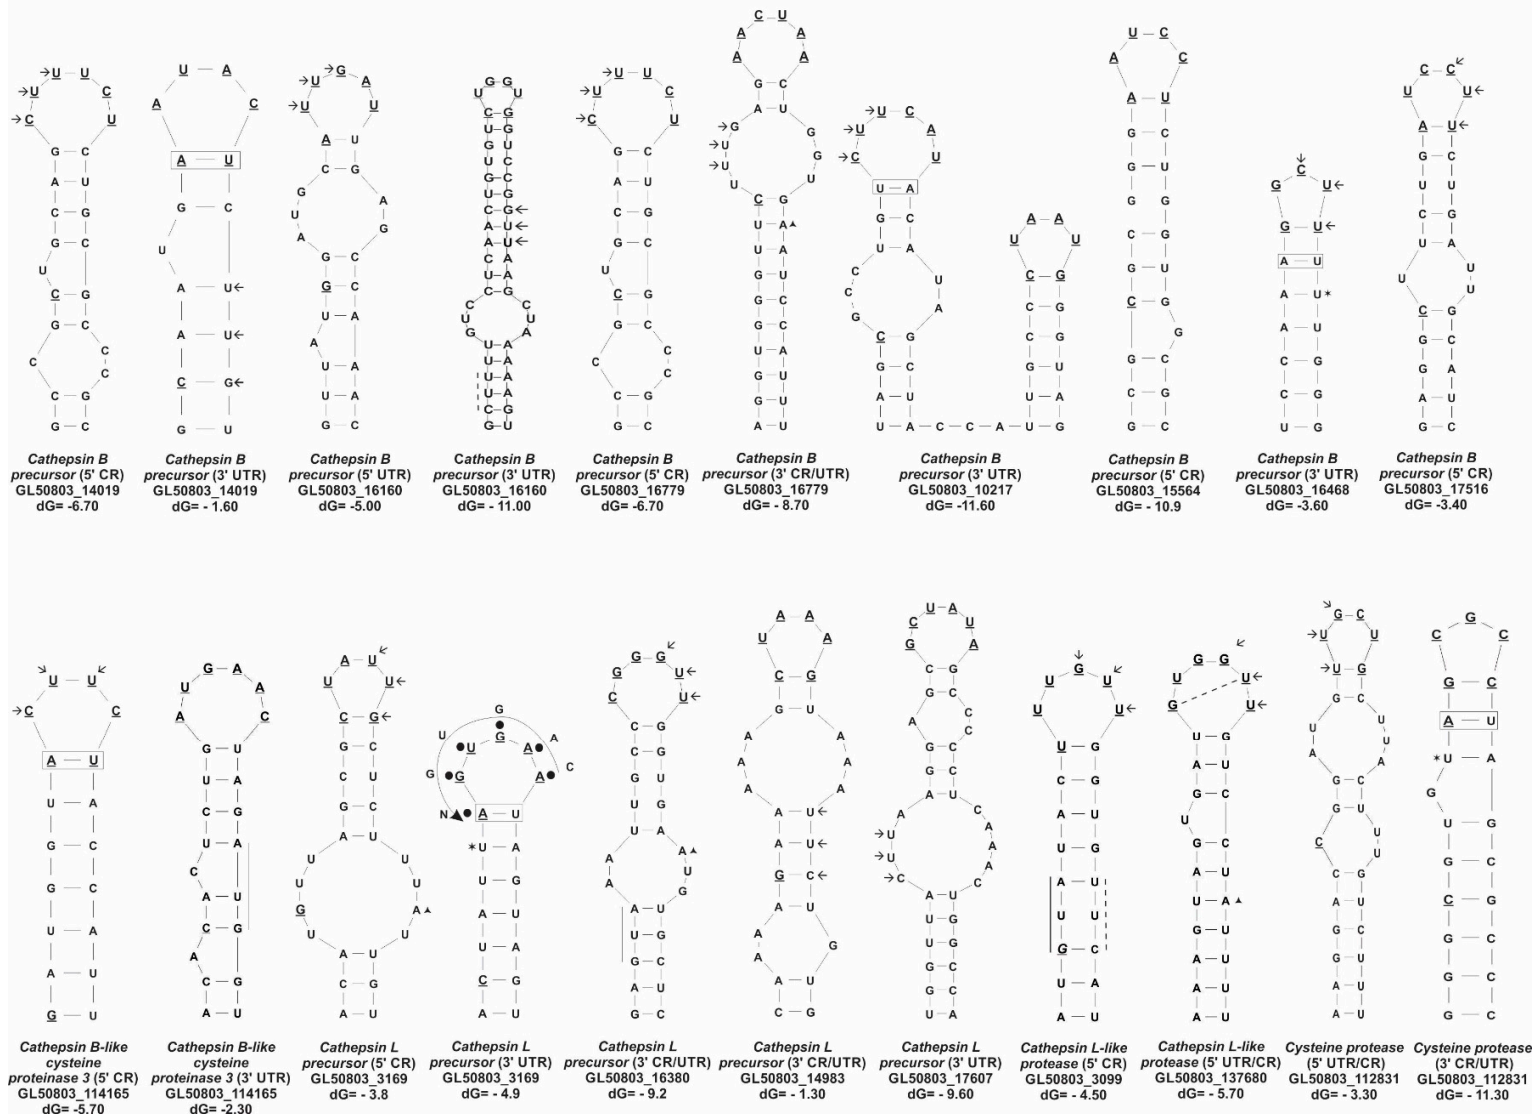



**Figure S1.** Prediction of stem-loop structures of *G. duodenalis* mRNAs coding for virulence proteins. The six nucleotides that form the apical loop of the canonical IREs are underlined. The dotted line in the loop indicates the residues at position 1-5 that form a pseudotriloop (G-C/C-G or G-U). Nucleotides U-A/A-U in rectangle indicates conserved nucleotides in the upper stem. Filled black circles indicate similar nucleotides to the CAGUGN consensus human motif and a large, curved arrow indicates the 5' to 3' or 3' to 5' orientations of the sequence. The GUU/UUG protozoa-specific motif is indicated in small arrows. Filled black squares show residues similar to that reported for the *tvcp4*-IRE loop. Asterisk: residue U conserved on canonical IREs. Small triangles show the residue A conserved in protozoa-specific motif. The residue C or G underlined indicates the unpaired residue at position 8. dG, Gibbs free energy or free enthalpy; in this case, a reduction in dG (negative dG) is a necessary condition for the spontaneity of the structure formation.

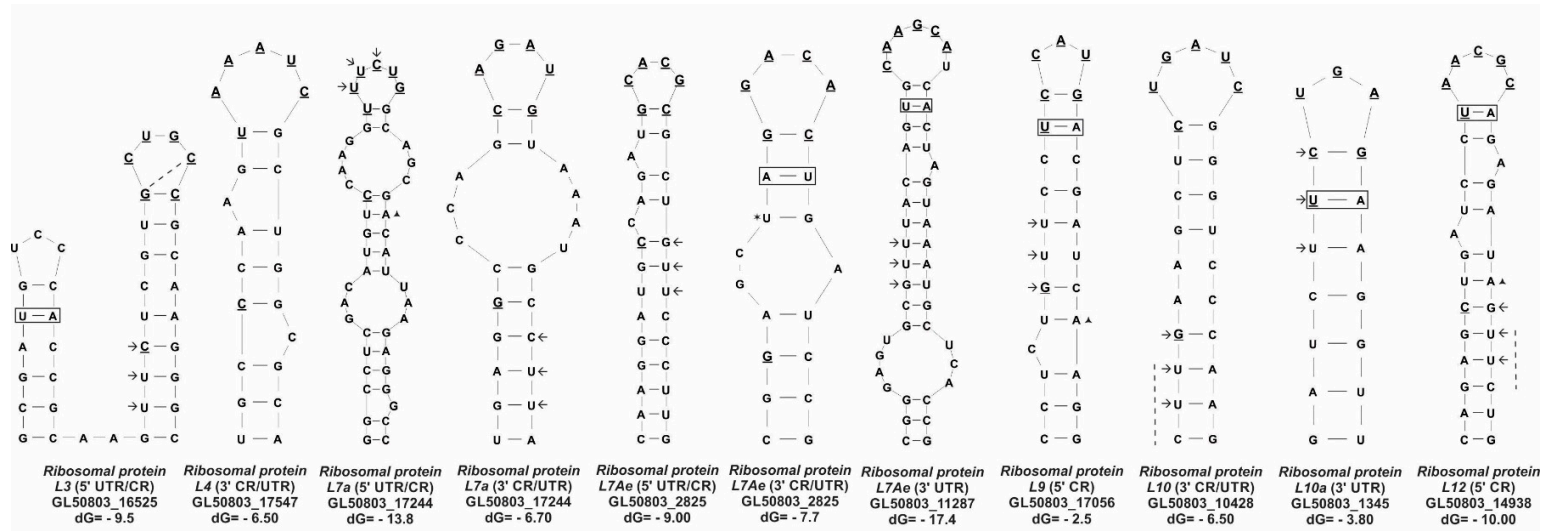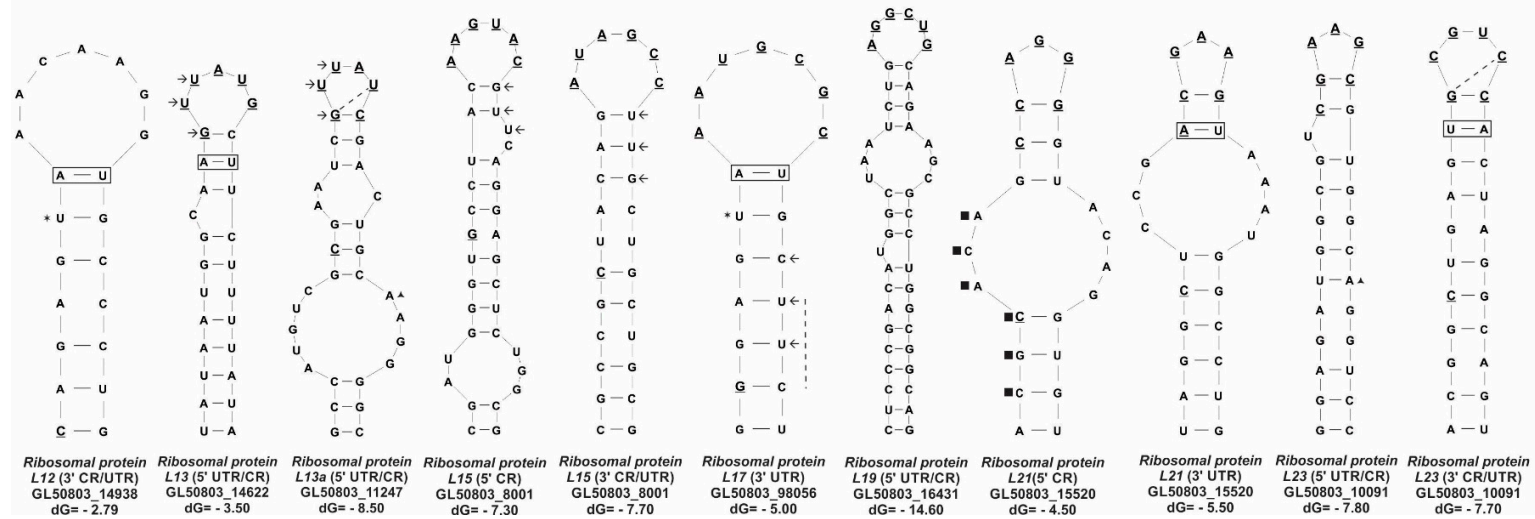



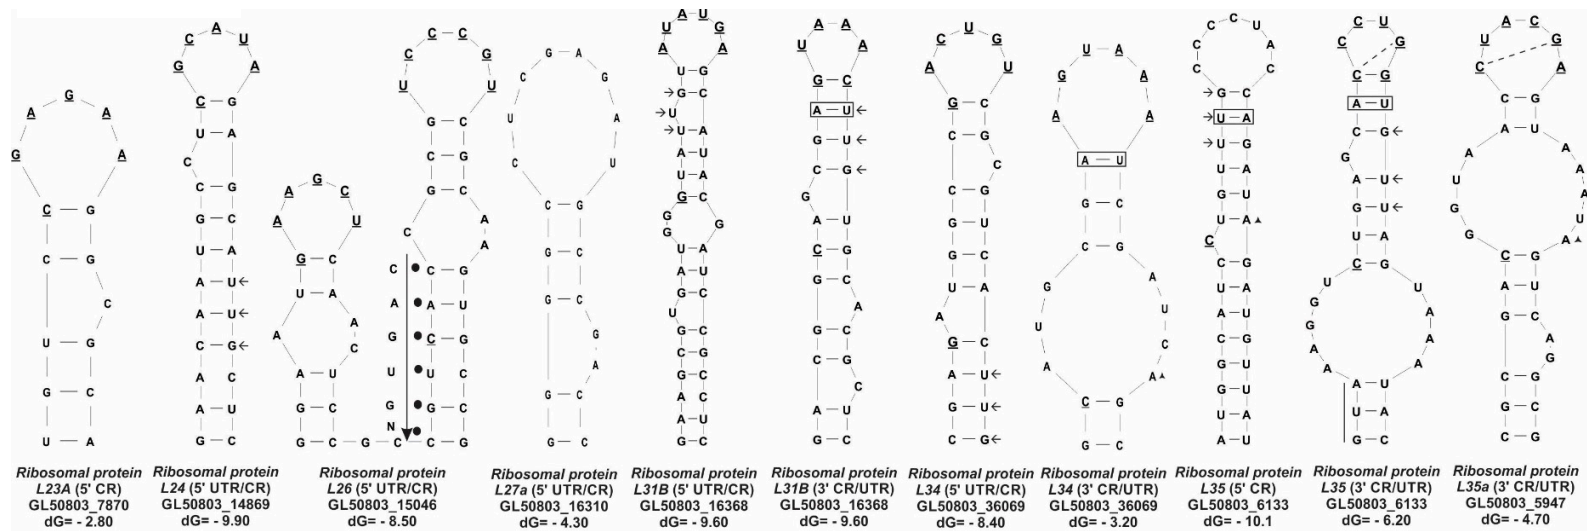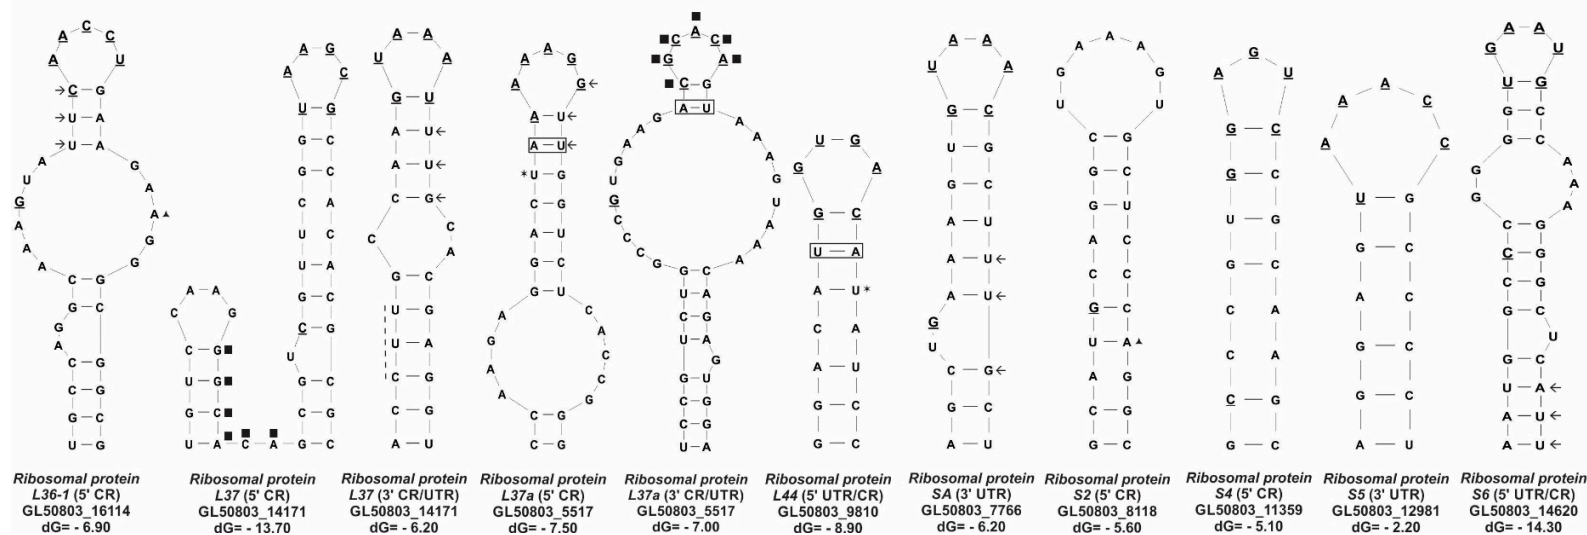

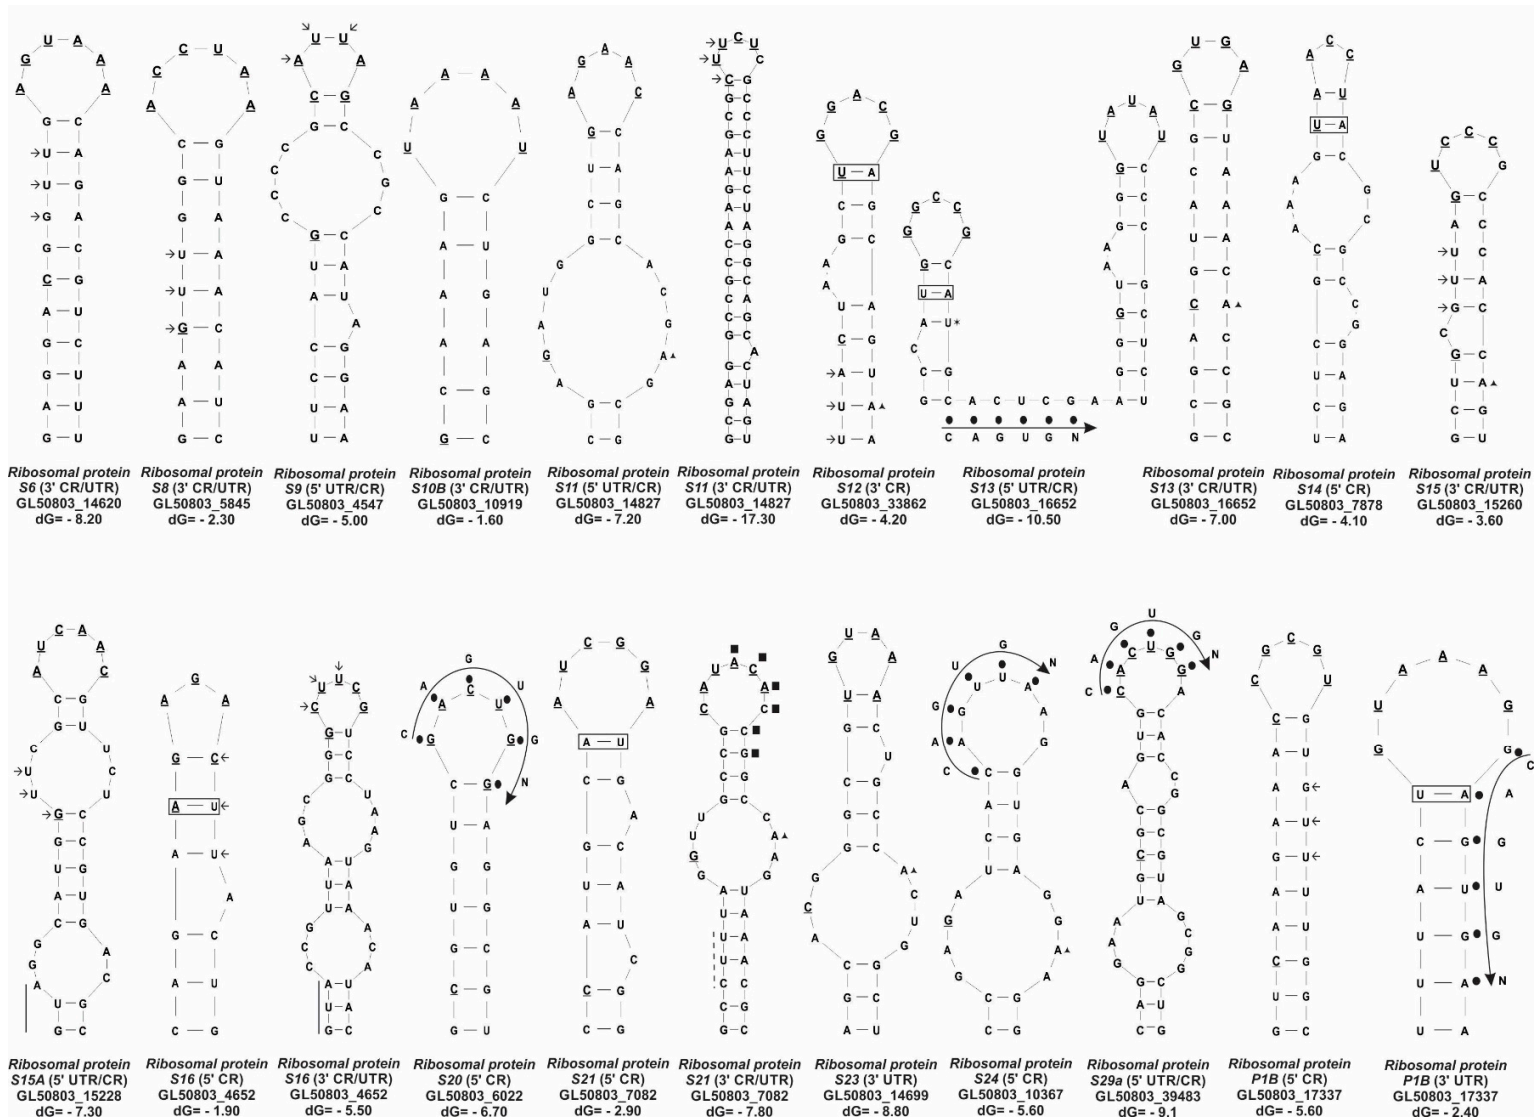

**Figure S2.** Prediction of stem-loop structures of *G. duodenalis* mRNAs coding for ribosomal proteins. The six nucleotides that form the apical loop of the canonical IREs are underlined. The dotted line in the loop indicates the residues at position 1-5 that form a pseudotriloop (G-C/C-G or G-U). Nucleotides U-A/A-U in rectangle indicates conserved nucleotides in the upper stem. Filled black circles indicate similar nucleotides to the CAGUGN consensus human motif and a large, curved arrow indicates the 5' to 3' or 3' to 5' orientations of the sequence. The GUU/UUG protozoa-specific motif is indicated in small arrows. Filled black squares show residues similar to that reported for the *tvc4*-IRE loop. Asterisk: residue U conserved on canonical IREs. Small triangles show the residue A conserved in protozoa-specific motif. The residue C or G underlined indicates the unpaired residue at position 8. dG, Gibbs free energy or free enthalpy; in this case, a reduction in dG (negative dG) is a necessary condition for the spontaneity of the structure formation.

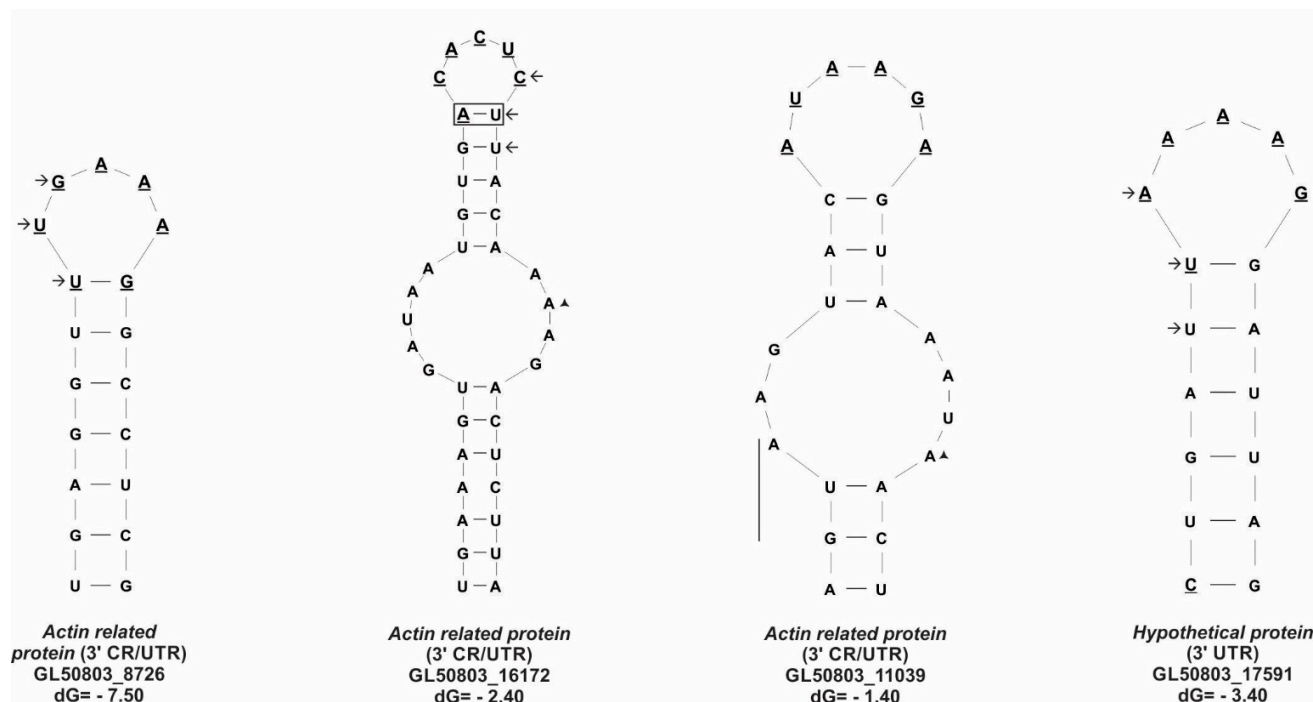

**Figure S3.** Prediction of stem-loop structures of *G. duodenalis* mRNAs coding for cytoskeleton proteins. The six nucleotides that form the apical loop of the canonical IREs are underlined. The dotted line in the loop indicates the residues at position 1-5 that form a pseudotriloop (G-C/C-G or G-U). Nucleotides U-A/A-U in rectangle indicates conserved nucleotides in the upper stem. The GUU/UUG protozoa-specific motif is indicated in small arrows. Small triangles show the residue A conserved in protozoa-specific motif. dG, Gibbs free energy or free enthalpy; in this case, a reduction in dG (negative dG) is a necessary condition for the spontaneity of the structure formation.

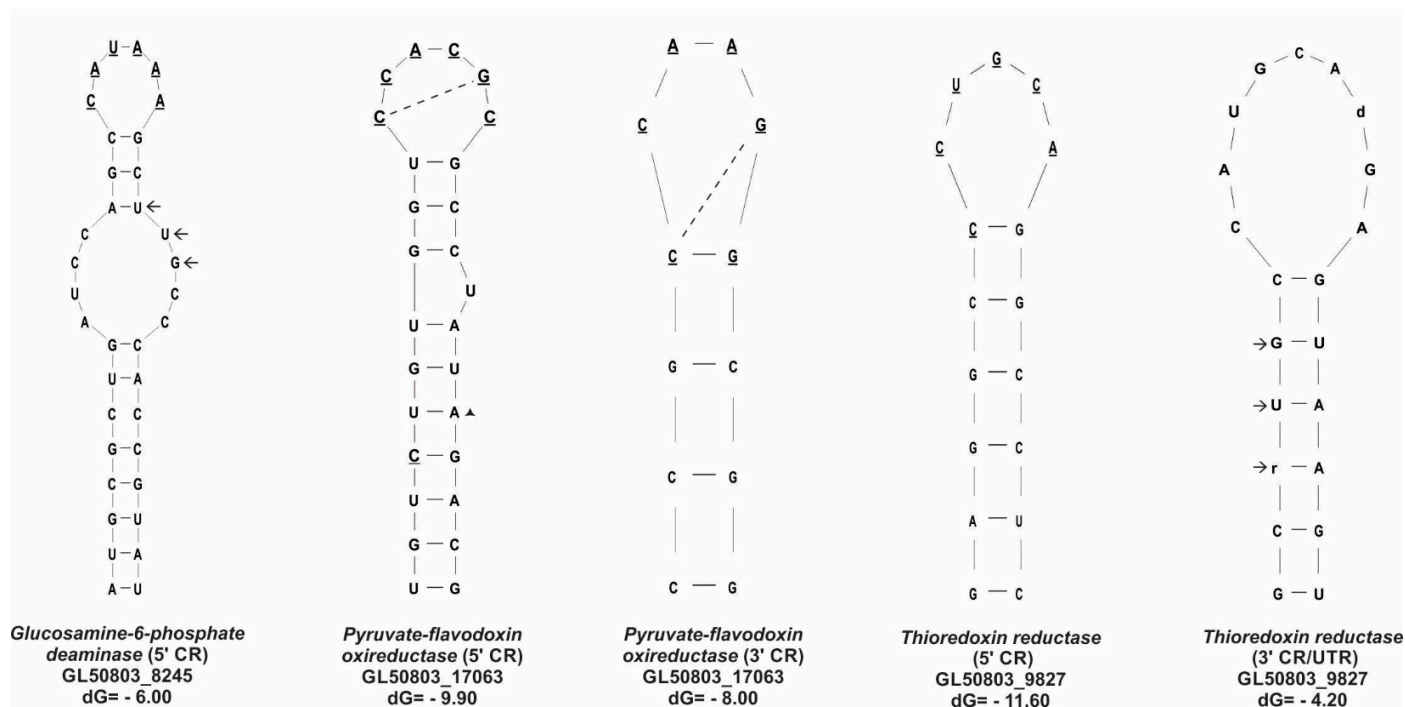

**Figure S4.** Prediction of stem-loop structures of *G. duodenalis* mRNAs coding for metabolic proteins. The six nucleotides that form the apical loop of the canonical IREs are underlined. The dotted line in the loop indicates the residues at position 1-5 that form a pseudotriple loop (G-C/C-G or G-U). Nucleotides U-A/A-U in rectangle indicate conserved nucleotides in the upper stem. The GUU/UUG protozoa-specific motif is indicated in small arrows. Small triangles show the residue A conserved in protozoa-specific motif. dG, Gibbs free energy or free enthalpy; in this case, a reduction in dG (negative dG) is a necessary condition for the spontaneity of the structure formation.

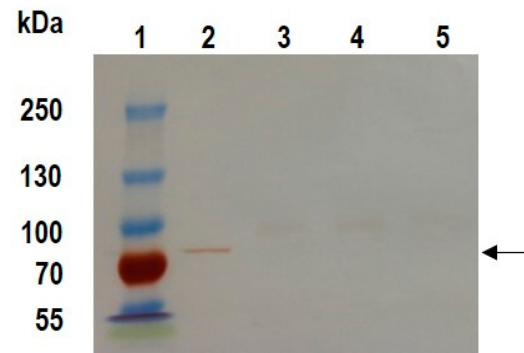

**Figure S5.** Immunodetection of a cytoplasmic protein in *G. duodenalis* by an anti-human IRP-1 antibody. Western blot assays using cytoplasmic extracts of parasites grown in different iron conditions and interacting with the anti-human IRP-1 antibody. Lane 1. Molecular size markers. Lane 2. Cytoplasmic extracts under iron-restricted condition. Lane 3. Cytoplasmic extracts in normal iron concentrations. Lane 4. Cytoplasmic extracts in high iron concentrations (200  $\mu$ M). Lane 5. Cytoplasmic extracts in high iron concentrations (300  $\mu$ M).

**Table S5. IRE-like structures predicted by SIRES web server of some mRNA from *G. duodenalis***

| <b>Annotation or common name</b>          | <b>Gene ID</b> | <b>IRE Sequence</b>                  |
|-------------------------------------------|----------------|--------------------------------------|
| <i>Pyruvate-flavodoxin oxidoreductase</i> | GL50803_114609 | TGCCTGCCACGCGCAGAGCTACGTGAGCAAG      |
| <i>Cathepsin L precursor</i>              | GL50803_3169   | GAAAGGTTCGCAACCAGGGGTCTGCGGGTGC<br>T |
| <i>Cathepsin L-like protease</i>          | GL50803_3099   | GTAATTCCCACTGTAGAATTGGAGGAAAAC       |
| <i>Hypothetical protein</i>               | GL50803_113303 | CCTTCCCCCTTGCGGGAGGGTGACGACCAGA      |
| <i>Ribosomal protein L7a</i>              | GL50803_17244  | TCTTATGCGCGAGGAGCCGTCCGCTGACCGC      |
| <i>Ribosomal protein L12</i>              | GL50803_14938  | GGTCTTCCGCCCAAAGTTGTTGGTGAGAAGA      |
| <i>Actin-related protein</i>              | GL50803_8726   | AGCAGAGCCAGGTGGGAGCATCTAGCATGCCG     |

**Figure S6. Attached material showing the sequences of some mRNAs presented in our study and analyzed by SIRES web server.**

**>Pyruvate-flavodoxin oxidoreductase (GL50803\_114609)1-4002**

CCAATGGGCTAGCGAAAACCCTGGTGCCCCCTATGGTCTGGAGCAAGGCCCAAACGGGTA  
ACTTAATTTAAAGCTTAAACGCCTGTGGTCAAGACATTTTCAGAGGCCACAAAATTAAAAT  
ATGACGACCGCCCTGTCTCTCAGGAGCAGCTGTGCATCGACGGCGCGACTGCGACGTCC  
ATGATGGTGTACAGGCTGATCGACTTCACGGCCATCTTCCCCATCACCCCGTCCTCTGTC  
ATGGCCGAGATGATCGAGCAGTACGCCGCGCAAGGCAAGAAGAACATCTTCGGAAACGTC  
GTCAGTGTCCGCCAGGCCTGGTTCGGAGCTTGGAGCCATTGGCACGTGTCACGGAGCAGCG  
ACCGCAGGCGCCCTCACGGCGACCTTCAGCTCGTCGCAGGGGGTCTCTCTCATGATCTCT  
AACCTCTACCACATGGCTGGCGAGCGCATCCCCTTCGTCCTGCACGTCGCCACGCGCACC  
GTCGGGATGGCAGCCACCTCTCTCGCTACAGATCATACGGACGTCTACGCAATCGAAGGC  
ACGAACATGTGCGCCCTGTCCAGCTGCAACGTCCAGGAGTGCTACGACATGTCTCTGGTT  
GCCCACACGACTGCTACGAATGTCCAGGCCGCCTTCTGCCATTTCTTCGAGGGATATCGT  
GTCTCCCAACGATTCGAGACGATCCAGGTCTTCAAGGACGACGCAGACATCAAGGACTTC  
CTCAGCGAGGACCAGCTTGCCAAGTGGAGGAGCGAGAACGCCATGGACACTGATCGCCCG  
ATCGCCTCGAACATCGGTCTCGGAGGCGAGATCCACATGCAGATAGTTGAGTCCCAGGGT  
GCTGTCTTCGACTCTATCCCGTACCGTATCGAGGAGGCCTTCGACCTGCTCCACCGGAAG  
ACTGGCCGCGGTTACCACTGCTTCGAGTACTTCGGCCACCCGACCCCGATGTTGTTGTC  
GTCGTCATGGGCGCAACCAGCCTCACTTTTGA AAAACGTCGTCGACGCGCTTGTTAACCGC  
GAGAACCGCCGCGTTGGCTTTGTCAGAGTCCGCCTCTTCAGGCCGTTTCAGCATCGAGCTC  
TTCAGCAACGCTATTCCCAAGTCTGCGAAAGTTGTTGTGGCCCTCGATCGCGCACCAGAG  
CTCCTGAACGCCGGCGGTACGCTCTACCGCGAGACTCTTGCCGCTCTCATGAAGACTGGC  
CGCCTTGCGCGGGCAAGAACTCTGTCCGCCTCGTTGCTGGCGGGCGCTACTCGTACTAC  
GGATGGGAGCTCGGGCCCGCAGACGTGGTCACTCTCTATGAGACGTTTCGACGTCAGCACG  
CGCCACGTTCGAGAAGATGCCGACGGAATTCGTGCTCAGCATCAAGGACGATATCCGCAAG  
CGCTCTCTCCGCCCCGCGCTCCCGGAGCACGTCCCGAAGAGCCTCCTTCAGAGGGCACC  
ACGGAGTGCATCCTCTGGGGTCTCGGCTCAGACGGCACCATTGGTGCCTGCCGCAACGCC  
ATGAAGATCCTCTCCGACCGCGTGGGGTGCGAATGCCAAGCCAACTTCGAGTTCGACGGC  
AAGAAGTCCGGCGGCACCAACCGTCTCACACCTTCGCTTCGGGCCAAAGAAGATCAGGGCC  
CAGTACAACATCGAGGAGGCCGGGTATGTTGCCTGCCACGCGCAGAGCTACGTGAGCAAG



TTCAACGTCCTCCACGGCATCAAGGAGGATGGGTTCTTTGTCCTGAACACGGAGCATGAT  
ACGGTCGAGACTCTCGAGAAGTATCTGCCTGCCGAGATGAAGAGGGAGATTGCCCCGAAAG  
AACATCCGAGTCTATGCCGTCAACGCAAATAAGGTCGCGCAGTCGGTCGGCCTTGCGCGA  
CGCATAAACACGATCATGATCCTCTTCTTCCTCAAGCTCGGGCTCAGCAAGCTTCTTGAC  
TTCGATGTCGCCTGCGAGGACATGAAGGCTGCCGCGAGGATTACCTACGCTAAGCAGAAG  
GCAGAGGTCATCGAGGCGAACGTGAAGGCCATTGACGTTGCTCGCTCCATTATAGAGCAG  
TGCCACATAGAGTACGATAAGGCGCGCTGGGTCAACGCTGACCCGAGCGAGTCGACTGCA  
AACCAAACCTACGGCCCAGAGCCTGACAAGTATGTCAAGGACATCATCTTGCTGCCGTC  
ACGAGGAAGTTCGCCAACATCGGCACCAAGGATGTGATGAAGTACAACCTCTGGGAAGATT  
CCAGGCGGCTACTCCAAGTATGAGAAGCTCGGCTCTGCCGCCAAGGTTCCCATGTGGAAG  
AAGGAGAACTGCATCCAGTGCGGTTTTCTGCTCTGTCCAGTGCCCGCACGCCGCCGTCCGC  
TGCTTCGTCATGAATGAGGACGCAAAGCCTGACAACGTCCCCGAGGACTTCGAGATGCTC  
GACATGAAGGGCAAGCTCGCTGCCGTTAACAGCGATTTCCTCGAAGATCAAGTTCCGCGTC  
CAGGTTTCGCCGCTCGACTGCAGGGGATGCGGAGTCTGTGTAGAGGCCTGTCCCAAGGAT  
GCCCTTGCCATGACCCCCATCGACACTGTCCTCGACAAGCAGCAGAAGCTCTTCGACTGG  
GCCTACGATTCTTTCAGTTCACCCAGGGCACCACAAACATCGACACGGAGAGCTGCAAC  
CTCCGCGACCTGCAGCTCCGCTTCCCGTACATGGAGTTCCCTGGCTCCTGCCCCGGCTGC  
GGTGAGAGTAACACGATGAAGATGCTGGCGACCCTCTATGGAGATTTCGATGGTCGCCTCC  
ATCGGCGTCGGGTGCTCGCTTGTCTGGATGCATTTTCGGCTACATGCGTCCGTTCAACCTT  
GACAGCGACTCCCGCGGTATTGCCGCCTGCTCGTCGCTCTTTGAGGACAACCTCTGTTTTC  
GGCTGGGGTGTCGCTCTTGATCGCGATGCCAAGCGTGCAAACCTTCGCGAGTACCTTCAA  
GCCAACGTCGAGAAGATCACTGACGAGTCCCTGAAGACTACCGTCCAGGGCTGGCTCGAC  
GCGTTCGACGACCGCAAGGCCTCCATCCGCACGTCTCGTGAGCTCCGCAGCACGGTCGGC  
ATCGAAAGGCTCGACAAGGGCGACTACAAGAACAACCCTGAGTATATCATTCCGACTGTG  
GACAATCTTGCTTCCAAGTTCCAGCAGTCCGGCGTCGATCTGGATGTTGCGAAGCACATC  
CTCCTCAACAACAACCTTATCAAGGCCTCCCATTTGGCTTGTGGGCGGTGACGGCTGG  
GCCTACGACATTGACTTTGCTGGCTTCGACCACATCGTCGCCTCTCGCGATCGCGTGCGT  
GTGCTCGTTCTCGTCAACCACTGCTTCGGTAACACGGGTGGCCAGAAGTCGAAGGCCACG  
TCGATCGGCAGCGTCATGAAGAACGCGTACTCCGGCGTCAACGTCAAGGACAAGAAGATG  
GGCGTCATGCTCATGAGCACATAACGCGACGTCTACGTGGCACAGATCTCCCTCGGCTAC  
AACCGTAACCAAGGCCCTCCAGGTCTTCAGGGAGGCAGAGCACTTTGACGGCCCCGCAGTT  
GTTCTCGCCTACTGCCCCGTGCATCTCGCACATGGTCCAGGGCGGTCTCACTCACCAGGAG

AGGCAGCAGAAGCTCGCCGTCGAGACGGGTGTCTGGCCTGTCTTCCGCTACAACCCGTCC  
AAGCCCATCGGTGACCGCATGAAGCTGGAGTACAAGGGGCCAATCAAGCCCGTCAAGGAC  
TTCATGAACACGGAGCAGAGGTTCTGGCGCCCTTGCAAAGAGGGACCCTGCCAGGTTTCGAG  
GAGATGGCTGCGGCTCTCCAGTCCGACGTTGAGGAGCACTGGAAGGTTCTTCAGGGGGCTC  
AAGGCCATCGACGTGCCCACGGACCCGATTGTTTTCGGGTAAAAAAGTGAATCATCTCGC  
GATGCTTTTTTCGGGGGGTCTTGTACGTCTCTTACGGTATCCACCTTGCTCTCCACGCTCT  
TCTGTTGCTGCTCCTCGTGGCCCAGTCTCCTTCTTGTCTTCCA

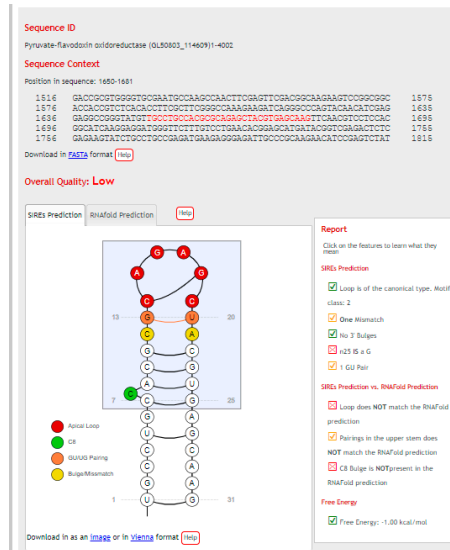

### >Cathepsin L precursor (GL50803\_3169)1-1935

AAATACTTCAAAAAAGTGTTATGCCAATATGGCATAAAATATTA AAAACTGTGGAAATTC  
ATTCTGAATTTCTCATTGAGGTAACCTTAATAGTTACAAACTGCAATCTAAGACATCTCAC  
ATGTTAGCGCTATTGCTCTTTATTGTCTGCTGTGTTTCCCATGATCCGAGTAACATGGCC  
TTTTATATTGACCCCGATAAAATCACATTTGAGACAATTCATGAAAACACAAAGACCCTG  
TTTTCTCTTTTCAACAGTCGTTTTACTTTAGACTATCCCTCAGATGAGGCTCACAACAAA  
GCCTTGCTGTCTTTCGCGAAAAATCTAGCACACCACAATGCGACCCATGCGAGGGACACG  
GACCACCTGGACGAATTGTTGAGGTATACAGATGGATATGCAACATATGGGCTGACATCA  
GCCTTTGCCAGAGACCCAACTGAGCCCATGAAGGGATTTGTCCAGGACACCGGTGTCCCC

GAGTACGACTTGAGCAGCTTTAAGGACAGAATACGCTCAAGATTGAATCTGTTCAAGGAA  
GCAGCCGCTTATCAGCTCAAGGTCATCTACTCTGCACTAGTGTCGGCTGCACTTCCGGCC  
CCTCGAAGTGGATGCACTACGATGTACATACGGCAAAACCCCCTTTCTCCTTTATCATCG  
ATTCCGTTGTCTGCGGATTTGCGCGAATTCGAGGTTATAGGAAAGGTTGCAACCAGGGG  
GTCTGCGGGTGCTGCTGGGCAATGGCCTCAGCTGTCATGCTAGAGGGTATGACCCGGTCC  
ACACAAAGTTACTTTAAAGACAAAACGGAAGTTGACAACACGTTCAAAGATGTAGACCTT  
ATTGTTTCCGAGCAGTACATAATGAACAACTCTCGCAGCTCTATCAACAACTTCTGTGAA  
GGTGAAACTACAGGATCACATCGATGGATTATGCCAATGAAAACATAGTTAAGACAGTG  
GAGTCTGAAAAGAATTTTCCACTAGAATCGACTCACTTGGAGAAGAATCCATCAAGAATT  
GACGTTATAGCTAATTTCAAAGTGTCCAAGGCCTTCTTGCCTTACAACACAGAGACAGTG  
ACAGGGACCAACTGCAAAAGGTCTATCATTAAGCTGCTGGACAAGATGCAGACCTCGTCG  
CCAATGACAAACGGGGCCGTCAATCAAATCAAGTCTTACCTTGACGGGGGATCCCTGTT  
GCCGCGGCCATGTTTACGGGGGCAGACGGGCCTCTGTCCTCACGAGACTTCAGCAACTAC  
AAGGGCGGCATTTTCAATAAGCCGTGCAGCAAAACAGGGCTTGACCACCAAGTCATGTTT  
GCGGGATATGGATATTACCAGGGAGTTGAGGTCTGGGTCATGCGCAACTCCTGGGGAGAA  
CAGTGGGGGTCATACGGCCACTTCTACACACCGATAGGCAACAACGTTCTTTGCTCTGAG  
ACGTACGCATATACAGACATACCACAGTACTTTCCATTAGACAAAGCTGATAAGGACAAG  
CCATACACAGAAAGGCAAAAAACGAAAGCTTCTACCTACTGGGCGAGAAAATTAAAACGT  
GGAGATGGTGTAGCCCTCGACTCAGACCCCTCTACGATACCACCAGCCAGTCCAGGCAAT  
GATAATGACATATATGTTCCGAGAGGGAAGATCATTTCTGCTTCAAGCAGTGGAAGTACTAGT  
AGTAGCAGCAGTAGCACTACTATCACGGGCAAGTTTAACTTTCAATCCCGAGTATTATC  
ATGATTGTGACGGGCATCCTGGGGAGCGCAGGCGTTGCAGGCATTATCGCAAAGTTCACC  
TGCTGCAGGAAGTAGGTGCGGATGACTTCTAACTATTAGTGAATAGTAGTGAATAGTAAT  
AGACTAGTGGACAACCTTAGGATTGATTTTTTTTCTTTGCAATCTTCTCTCTACAAACAAT  
TTTAAATTGGAATTT

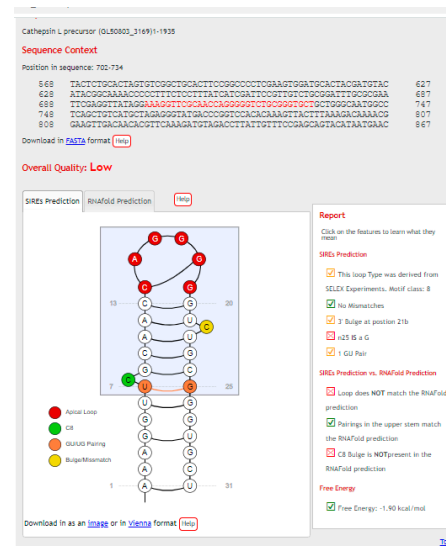

### >Cathepsin L-like protease (GL50803\_3099)1-1530

TGTAGTGTCTGATGAGGAACTACGTAAGCAGCGTGCAATACGACAGCGTGAAAAAACTGA  
 GCGGAAACAACGAAAATAGGAATTGTGTAAATAACGAAAATAATATTTAAAAGAACCATA  
 ATGTATACTTTGTTGGTGTTCACTGTCGAATCCTCTGCATATCCTATTAAGACACGC  
 TCTTACACAGGAACCTTTTCGGCATGCACTAAGGACAATGCAGTTGTTTCGTAGATTGCAA  
 TCTAACGATCTGTTTCTGCTGTTGGCTAATCCAATTAAGTGGCCGCAGAGGACAACCTA  
 CCACAATCTGTTGACTTAAGGGAGTACGGCCTTATGACTCCTGTCAGAAACCAGGGTAAG  
 TGCGGCTCGTGCTGGGCGTTTGCAACCGTTGCAGCCTTCGAGGCGTGTGCCCTGTATGAT  
 GCGGTCCTTTACCCTTACGGAAGTCCACTTGGCAGACACACAGACCTCCTGCACATCTCT  
 GAGGAGTTTGAAATCTTGAGCTCCACGTCCAATAACCTCTGCTCAAGTGGCAACGTGGTG  
 CGATTGATTAATGACCACCTGACGGGAGTAATCCCACTGTAGAATTGGAGGAAAACCTT  
 CCTTACAGTTTGAGTGACAATACTGAAAGCGAGCCCCCGCACACCCCCTGCAGCCTGCG

ATTCCACCCGAGGAGTATGTGCTTCCAATTTATTCTGAGACAAAGCTAGGGCATAAAGCA  
 GGGGTCATAGTGCTTTACAACAGAGACAATCCCTATAATGACTCAATTGCACAGCTGGTG  
 AAAACGTATCTGTCACTGGGGGTTCTGTGATGGCTACGATTAACACGTGGGCTAATGGA  
 AGGAAAGGTCACCGGTTAATTAAGCGTTATCGCGGTGGCATTGAGCGCACCGTGCCGT  
 AATACAAGCCTGGATCACGAGGTGCTCATTGTTGGATATGGACGGTATCGAGGTACTGCC  
 GTTTGGATAGTTCGCAATTCTTGGGGAGCTGACTGGGGAGTCTATGGGTATGCATATGTG  
 GCCCAGGGCGGTGACAGCTACTGCTTGGAGCACAGTGCCATTGCTGTTCTTCCCCGGACA  
 CTCGATCCGACCGCCAAGTACGCATCCTTCTCTACGCATCCACCTCCGTCTCCGCTCCTC  
 CGGCCGATATATGAGGGCACTATTGTACGCTGTGAAAACGGGCTCGATGCTGATCCACCG  
 GAGGGTTGCAGCCCATTCACTAGGGGCAGCTCGCCCGCGCTCGGGGCCAGCATCGCCCTC  
 AACTCACAACCATAGCAGCTATAGGGAAATTTACTACCAGCCCAGCCCCTTAATCAAC  
 CTTTCGTCGTCATGATCGCGTCGAAAATGCGAGTGTGAGGAACAAGGTCCTGAAGCAATA  
 ATCACCGAAGTGCTCGGAATTATCGGATAAGACAGTCATTATCTCGGCGAGATTCTTCTG  
 CATCATCATCTGGTTGAAGCGGCGCTCCTCCGAATTCTTCTTGAGGATGGGGAGATACTT  
 CGCCACGCTCTCTGCGAAGGACTTGATCTT

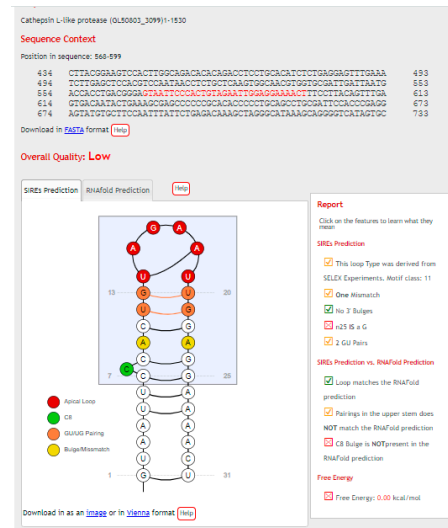

**>Hypothetical protein (GL50803\_113303)1-2655**

CTGCAGAAGAGTAAAATGCAATGTAAATAGCCTCCTCAATTTTTTATTCCACGGCTTTCC  
CTGCGGGATTCCCTGCAGGTCTCCCTGCGCCACTGCTCCGGGAACGGCCACGGAAATAAA  
ATGACGGTACTTCTACCATTCTTACTATTGCTATATGGCACACTTGGCAGAGAGCCTTCC  
CCCTTGCGGGAGGGTGACGACCAGATGGACCCCGAGGGCGGCACGATCTTCCCTTCCGAG  
GACGAGTACAACGAGCTTCCCGATGGACCCGACAACGCAGATCTGACCCGCGCAGCGCTC  
CCTACCAACTTCACCTACCGGGGCCACCGGTGCATCCAGATCATAGACCAGGGCTCGTGC  
GGCTGCTGCTACGCGGCGGCGGCGGTGGAGATGGTCACTGCCCGGCGGTGCCTCCAGCTC  
AACGACAGCAGGCTTGTGAGCCTCGAGGACCTCGTCACGTGCGACCACCAAGTATCTG  
AACATCCAGAACAACGGGTGCCGCGGCGGCAATCCCCTTGCGTCGCTGAAGTTCGGAGAG  
ACGACGGGCATGGTGTACGACACCTGCGAGGACTACTGGAACCGGACGTATCCCTACCCC  
ACGGAGACGTGCAAGACCGTCTGCAAGGATAAGCGCCCCAAGGACCGCACCATTAAGAAC  
AAGGCGCCCTACAGGCTCAGCGGCGTGGACGCGATGATGCGCGACATATACCAGAACGGG  
CCCATTGCGGTCTCCATGTACCTGGCCAACGACTTCCCCTCCAAGGACAAGAAGGGCATC

TACAGCTCCGGCCCCAATACGAAGCTGGGGGGAGGCCACGCCGTGATGATAGTCGGGTGG  
GGCGAGGAGAACGGCGTGCCCTACTGGGACTGTGCGAACACGTACGGCACCAATTGGGGC  
GACCAAGGCTACTTCAAGATCAAGCGCGGGTCCAACGAGCTCAAGATCGAGACGTGGCCC  
GGTTCAGCGCTGCCTATAGACACGACTCCTAAGCCAGAGCCCCGAAACGGCACAATCACT  
GTAGAGACGGCCAAAACGTACATTGCCGGATACGAGGTTGCAATACCGTACGAGAAGGTA  
GCCACCCCTGCAGAGCTCCAGCTGAAGTCAGGAGCAGGAGCGGTGACGTCGCTCGTTAAG  
CTGACGACCTCTAGTGGCACCGCCCGCGTCACCATACTCGAGACACGTCTGCAGGGCAA  
TACTACCTGACAACCAGCACTGGAGACGCAACGTCTGCGCGCTTCTCGTTGGCGTCCTAC  
TTCACGCTGGCATTTCGACAAGGCTAGCTATCAGGGACAAGAGGGAGAGAGCGTCGCACTC  
CGTTTCGCTGCACCGCTCCAGGTGCCCTGCAAGTTGATGGACGGCGCGTCTGTGCTGGTG  
GAGCTCAGTAAGGGGGCGCAATCCTGCATGGCCCCGTCGAGCATGAGCGCTGGCAAGCAT  
GCGCTGACCCTAACCACGTCCGACACCGTTCCCGTCTATCCGCAAGCACAGTGCTCACA  
ATAGAGAAGAAGCACAAATGATGAAGCAGTCATCAGATATCTAAGCCGGTCGCCGGCGCA  
CAGGTGACTGCGTTGGCCGAGGGCCTGCAGATTTCTGTATACCTCAACGGGGACGGGGCGCA  
AAGCTGCTTCTCCAGGCGTATTGCGGAGAGCGACTGCTGGATGTCATCGCTGCTGGCCTG  
CCTCCCTCGGGAAGCATCGAGGTCCGCCTGCCGTCTTCTATGGCAACTGCTCAGCTGCG  
TACCTCCGATTGCGCTCAGAGACGTCCCCCTTCGCGTACGCCGATGTGGGACCGCTGCAT  
GTCACGTCGTACAGCTACCCTGCAGATAATCTCCCGGCCCGTCTGATAAGAAGGATCCC  
GTGCCCCGACCCGGAACCACAGCCCAACCCAGATCCCGAACCTGAGCCCGAACCTGAGCCT  
ATTGGCGACGTGCCCCTGCTTATTACGGAGCCGTCTACGCAGAGTGTCTGGGTCCCCGGC  
GGTGCAGTTACAATCCGATGGACCAGTAACCTAACAGCCGGTACTGAGATGACGATCCTT  
TTGTACGAAAAGGTCGGATCGAAAAGCTACCTGCGCCACACGTTACCCCGCTCTGCCCCT  
AACACGGGGCTCTATGCCGACACTCTTCCGGCCTCTGTCCCCTCTGGCCCTAACTACTTC  
GTCCGCATGCGCTCCAACAGTCCCATGTTACGAACACTTCGGATGACTTTGAAGTCAAG  
GCGAGCAGATACCTGGTCAGAGACGTTCCAGACGCCATTACTATGCGGGATCCTCTGAGC  
TTCATATCCATAGACACGGGTTTGTGTTTCCCTTGCCTCGCAGAAGGTTCTCGGTCACG  
CTAATGCAGGCGGGAAAGGAGGTTTGTGCACTTGACGGAGTCGAGGGAGTGGCAGGACTC  
AACACGATCTATCTAGATAGCTGTGCTGAGAGGATGCAGGAGCTCCGAGACAAACAATAC  
TACCTAAAACATATGCTCTCAGAAAATGGAGTGCACGGTAACGCCGACTTTCACGGTATTG  
GATGACACTCATTGACACACTCTGATGAACTAGATGGTAAATCTATCCTAAGCAAAGATG  
TTGTCGGTTACACTGGACAGACTGTCATAAGCTCCTTCCCTTCATAGCCGACCGACTTTA  
CCGAGGCTCCGAGAA

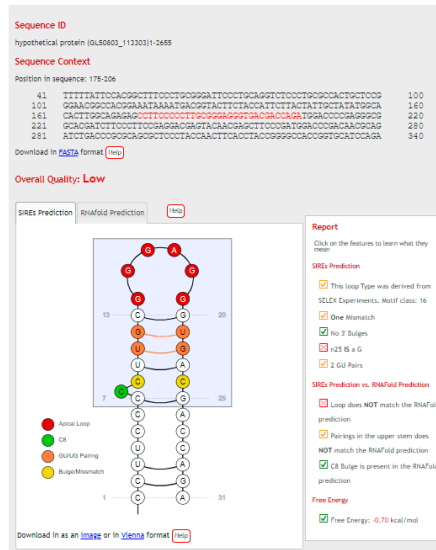

**>Ribosomal protein L7a (GL50803\_17244)1-1027**

TAGTATGTTTAAACACAATCGTAAACCGTTACTTCACCTAAATTCTATACCTGATCCCAGA  
 TTTAAAAAATAAAAACTAATTTAAATTTATTTCACTGGGTTCAATAAAACAGGCCTCGAC  
 ATGTCCAAGGTTTCTGGCAGCGACATTAAGAGGGCCCTCGCCGTACCCGAGAACAAAGAGC



CGCAGCAAGTGC GACTTCGACCTGACTCCGTTCTGTCAGGTGGCCTCGCCAGGTCCGCATC  
CAGAGACAGAAGGCAGTCCCTCCAGAGGCGCCTCAAGGTTCCCCCAACTGTCAATCAGTTC  
ATGAATCCGATCTCGAGGAACCTCACAAACGAGATTTTCAACCTTGCTCGCAAGTACTCC  
CCCGAATCGAAGGAGGAGCACAAGGCGCGCCTGCTCCAGATCGCCGACGCAAAGGCCAAC  
GGGAAGCCCCTTCCGGAGAAGTCTGACAAGCTTGTCATCGCGTCTGGTATCAGACGCATA  
ACATCCCTCGTCGAGAGCAAGCGCGCGAAGCTTGTCCTGATTGCAAATGATGTCGACCCC  
CTTGAAGTATGTTCTTATGCGCGAGGAGCCGTCCTGACCCGCACACACCTCTGATTGCG  
GGTTGTGTGTTGTACGCGGTGGACTTCGCTGTTCACCTGACAACTGACCCACAGCTCGT  
ACTTTGGCTTCCCACACTCTGTCAACAAGATGGGCGTCCCGTACGCCATCGTTTCGCACTAA  
GGGCGATCTGGGCAAGCTCGTCCATCTGAAGAAGACGACCAGCGTCTGCTTCACCGACGT  
GAACCCAGAGGACAAGCCCACCTTTGATAAGATCCTCGCGGCCGTGGCCCATGAAGTTGA  
TTATGCAAAGGCCATGAAGACGTACGGAGGCGGCGTTTCGCCGCGAGGATGAGGCCAGCA  
GATGTAAATGCCTTACATTTCTTTAGTGCATGTCCTTTGCTGCTTGGTCCTTTGTGCTCG  
GGCTGTGCACCTTGGTAGGCCTGGTCTTGTTCGCCGTCCGCAGCGCAAGCCCAGTGACA  
CGACGCC

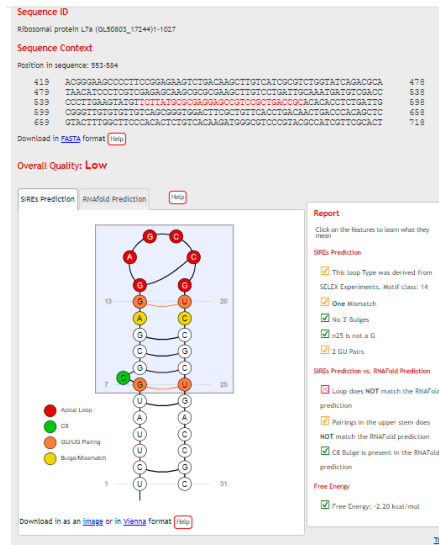

>Ribosomal protein L12 (GL50803\_14938)1-789

GTGGGGAGTATGCCCAGACACTTTTTACGTCTTTATTTCAATTTGTCCAATTAATAATATA  
 AATTATAGTTAAAGCATTTTAAATTTGATATTATGTCAGAGTGGTAGTTTTCCAGGCGACA  
 ATGCCCCCAGAGCTGATCCTAACGCAGAGATAGTTCTGTATTTGCGCGTCAAGGGCGGG  
 ATAATCCCCGCGCCAAATGCCCTTGGTCCAAGATCGGGCCCTACGGTCTTCCGCCCAA  
 GTTGTGGTGAGAAGATCCACGAGGCTACACAAGGCTACAAGGGGATCCGCGTGAAAGTC  
 CGCATCGTCTCAAAGAACAGACAGCCGACAGTCTCTGTTGTGCCACAGCCTCCTCGCTT  
 CTTGTCAAGGCTCTGGGCGAGGGTCCTCGCACGATTCCCAAGGGTCAGCCCCCTTCTGCAC  
 ACAGGCACAGTGAAGTTCGACACGGTCCTAGACATCGCAAAGGAGCTCCGCGCTAACTCC  
 TTCGCTCTGAAGTACGCCGGCACGGTCCTCGAGGTCCTGGGTTCTGCCCGCTCCGTTGGC  
 TGCAAGGTGGAGTACAAGGGCACTGTATATTCTCCCGCTGAGATCACGGAGATGGTGAAG  
 GCCGGGGACATAGAGATCCCAGAATATAATGTACCCTACCAGCTTGCTGAGGAGCAAGAG  
 ACAGAGTAAACAAGGTGCCCTGCGTGTACGGATCGGTCCCTATCTGCTTGGGACTGTTT  
 TCGCCTACGGGGGCTTAAAATATTTGATGGCCGAGGCGGCGGAGTCCTTTGCCGATGCA  
 GTCGTCCGT

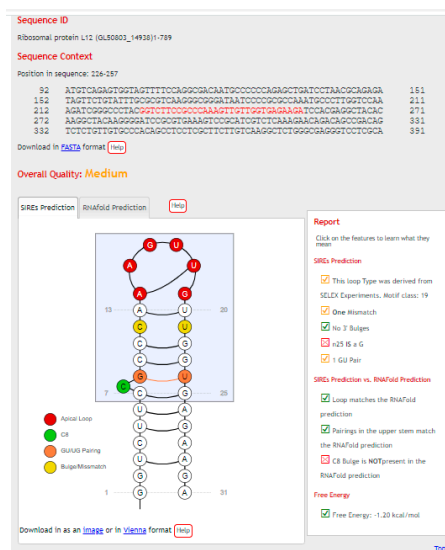

**>Actin related protein (GL50803\_8726)1-3147**

CCTGCTCTAAATTTTCATCCAAATTTTCATTTTATAAATAAATTCTGCGACAAGTTAATTTA  
AAAGAAAAGGACATATTCTTTGGAAAGCTTTTGTATTTTGGAAATTTGACTGAAATTATAA  
ATGTCTAGACCCCTGACCTCTCTTCGTGCACACTCCGGAAGCACCTTTCAGCATTTCGGCG  
GACTTGCGTAACGAGCTCGAAGAGGCCATTCTCGCATATACACATGGATACGCCGACAAT  
CTTCGCCAGTTTTTCTTGCAATGATAAGGCCAAGACGGGGCAGCTCTCTGACATTCTG  
TTCCGCCGGGCGCTTCGCTCCATTGGTATCCACGGACCAGTTGAGCTGCTTAATCGTGCA  
ATAGAAGAGGCCACTGACCTTAAGAGTGGACTAATAGATTATGAGGCGTTTTTGGGGCTC  
TTTGCGTTTAAGGGCGACATACCCCCGAGGCTGAACGAGGAACATCAACCATTGTTTCAT  
AGCCGATACGTGGGTAATTACGCAGAGCTTGACTCTCAGAAAAGCAAGAGACCTTCCTCG  
CGTTCAGCCACAAATCAGAGACAGCATCATGACGAACCCCTCAACCTTGCTGATGTTGAA  
GGTGATCCTCTACCTCAGGAGGAAGTGATTGCCGGCGCACCTTCGAGCAGAAGCACGTTT  
AATCTGCAGGAGGAGATGCGCAAGGCAGCGGATGACTTAAAGCGCATGCAATCCGAAACA  
AATACAGAATTTCAAGTTGGATTGAAGCTCATTGCGACCCAAGTACTTCAAAAGGGCTCT  
TGTGTTAAGTTTTCCGAACGAAATTTGACAGAAACCACAAGGGAAATATAGGGGTCAA  
GACTTCCTTCTGGGTGTTTCGATACCTAGGGATACCATCTGATCTGATTAGCAATGATGAT  
CTCGTCGAAATTTTCCAATCGTACTGCACAGAGGACGGCTCCATCTCGGTCATTGAGTTT  
GAGGCTATGGTGAACGCCGGTGAAGACACCAAGGACGTTACCCGGACTATGCACGATCGT  
CAAGCAAGGTCCACCAGAGACCCGACCCATGATGTGGCTCTTCTGCTGGAGGAAGCCCAG  
ACTGTTAGTGCAAGTGGGATCTCAGGTGAAAGGAAACCCTTACGTCGCACTCAGGGCACT  
CCAGGAAGGAATCTAACTGTTTCCAATCTTGCCACAAACCAGGGATCTGATCCTGCTTGC  
TCCTCAGCGCCTAGTGTTGCTGCAAGCACAATAACCGACCATCTAAGTATAGTGATGAG  
GAAATAGTAGGAACGCTCAAGCGAAAAATTGCATTGATATGCTCTAACAATACTCCTCT  
TTTGGTGATTGCATGGCTGATGCCCAAGACTACAACAGAAAAATTACACCAGACTCGCTG  
CGCAGGTTTGTTAGCTCTCAGGTGCCAAATTTAGATAAGAGATACGTCAATCTACTCGTC  
TCATACCTGTGCACACAGGAGAATCTCAGACAGAGTGCAAATTCGCTTGGGATAAGCATA  
GCGGAAATACAGCAGAGCCAGGTGGGAGCATCTAGCATGCCGGAACCAGCCTACATATCG  
GCAGTAGTTTTCAATGACCTTTACAAGCTTCCTACCGCTACAGACGGCGGGAAGAGACGC  
ATAGATGATGCTATCTGGACATGCATCACAACAGAGGCCAATCTGAGTAACATGGCTCTT  
TCTAAGGCAGAGCTTATGGCCATATCTGTTAACAACCAGAGGTCGCAGGGGCTATACACT

GATGACCCCCCTACGCCCTGTGAGCTCCAGACCCATGCTTCGGTGTTTGGTAACCTGAAC  
ATGGCTGAGGGCCGCCAGGGTGGGTCTCAGGGTGCCGCCATGGCCCAGGAGATCGCGCAG  
CATCAGCGCCACACTAAGTCTGGAAATTACTTTGATACCACCGCGGCCCAAATGATGAC  
ATCACGTCCTACGTCAACTGCAGTAATGTCAATATTGCGAACCCCGACACCCCCTCTACT  
CGCCGTCTCAGACAGTCTGGTCGTCAAGCCGAGCTTCTAACAAGCCAGCTCCAGAACCCC  
GCCTCGTCTACTCAGGCAGAGCGCGCCAGCGAGATAATACGTACTAAAAGACAGCTCCTT  
GAGGCAATGAACAATAAGCGGAGCGCACTGGCAGAGGCCTTAATCATGGCAGCAGATCGA  
GCGACAGATCCAATATCATTAGAACTATCTCAAGGACTTTACTCAGGAGTCTCTGACT  
AATAACCAAATACAATGCATTCTTGAGGGCTCTCTGGATTCTAACGGCAAGATCCAAAAG  
GAGATCATACTCAAGACTATGGGCCTCGATAACGAGTTTATAGCATATGCAGATTCCGGT  
TTGGAGAGTTCGAAGCTGAAGAACGATCGTGTTTCTGACAGTATGGTGTGCATCTCGGCC  
GTTGCGGAGCAAATGAATGCTTCGATAAGCGGAGCGCCACGCGATATGATCTCATCCAAG  
CGTGCCATGCAGGCCAGACAAAAGCAGGAGTCATCTATAATGAGGCAGCTGTCTGCTGCA  
GACCTAGATCTTATCAAACCTCGTACTCCAAACATGAGCACAGTGGCAAAGCATCAGGAT  
AGCTCTGCACTCGCCAAGGTTGTATTGACGTAGAGAAGAATATCACTGAGGATTATGAG  
GGCTGCCTAGCAGAAGCTACCGAGGCCATTGTTGGGGGACACAGAAGGCGCCACCTTGGC  
GGTGACCTCAATAAGAAGGACAACTTGTTATGAGCAATGGAGGAGTATACTCACTGCGA  
GACAGACAACTAGAAGAAGCAGAAGCAAACACCCGACGAATCAAGAACACCCAAAGGTCT  
GTCATGGAGCACTCCACCCCGCCGATGCTATTCCACGACGTGGACGCGGGTGCAATCAG  
GCTGTATCGCAGCTAAGCAGCACAAATTGGTAACACACTTAAACAAATTGATGAAGAATAT  
CTTGTAAGATTATCAATCTGGCCAAATTGATGAAACTGCCCCTGCTGAAGGAGGAAGTGTC  
CCGAAACCAGTTGCCTTTGAGGTTTGAAAGGCCTCGTGTCTATGGTATATACTATTTCCG  
ATGAATAAATCGCTTTGTTTTTGTATGCATGAAAATTTGACTTAAAATTTCGCCCTGTG  
ATTTGCGAGGTCTATGAAACAGGCTGC

Sequence ID

Actin related protein (GL3083\_8724)-1-3147

Sequence Context

Position in sequence: 1511-1543

1477

0CTGCGCAGGTTTGTAGCTCTCAAGTGCAGAAATTAGATAAGAGATACGTCAATCTACT

1486

1487

CGTCCAGACCGTGTGACACAGGAGATCTCAGACAGATGCGAATTCCTTGGGATAG

1496

1497

CATAGCGAAGATACGCGAGACCGAGTGGAGCATCTAGCATGCCGAGACCGGCTACAT

1506

1507

ATCGCAGTAGTTTTCAATGACTTTACAAAGTCTTACCGCTACAGACGCGGGAAGAG

1516

1517

AGCGTAGATGATGATCTCTGGACATCATCAACAGAGGCCAATCTGATGACATGAC

1526

Download

in

FASTA

format

new

Overall Quality: Low

SREs Prediction

RNAfold Prediction

new

10

20

1

25

1

31

Legend

Normal Loop

CE

Unfolded Pairing

Bulge/Mismatch

Download

in

as an

image

or in

Yarns

format

new

Report

Click on the features to learn what they mean

SREs Prediction

☒ This loop type was derived from MRE Experiments, MRE class: 16

☒ no structure

☒ 3 Bulge at position 21b

☒ G is not a G

☒ 1 GU Pair

SREs Prediction vs. RNAfold Prediction

☐ Loop does NOT match the RNAfold prediction

☒ Pairings in the upper stem does NOT match the RNAfold prediction

☐ CE Bulge is NOT present in the RNAfold prediction

Free Energy

☒ Free Energy: -3.00 kcal/mol
